# Supplementary material for: Fruitful interplay between theory and experiment in the design of circularly polarized luminescent materials
Source: Royal Society of Chemistry journal article supplement (doi:10.1039/d3tc03562j), 2023-01-01
Supplement: d3tc03562j1.pdf [file d3tc03562j1.pdf]

## Table of Contents

|                                                                                        |    |
|----------------------------------------------------------------------------------------|----|
| 1. Materials and Synthesis                                                             | 2  |
| 2. Spectra: NMR & mass                                                                 | 6  |
| 3. Optical Spectra: Photoluminescence lifetimes, <i>g<sub>lum</sub></i> -vs-wavelength | 18 |
| 4. Computational studies                                                               | 21 |
| 5. Cartesian Coordinates                                                               | 34 |

## 1. Materials and Synthesis

**General.** Unless otherwise indicated, all reactions were carried out under dry and inert conditions by heating all glassware with a heat gun under vacuum and purging with argon. All chemicals and solvents were purchased from commercial suppliers in anhydrous form or were dried by known methods or, in the case of THF were taken from a MBRAUN SPS 800 solvent purification system. Solvents were degassed by the freeze-pump-thaw method. TLC was done using precoated polyester sheets (40×80 mm) from Machery-Nagel (POLYGAM® SIL G/UV254) with 0.2 mm silica gel 60 with fluorescent indicator. A UV light source from Köhler (254 nm and 365 nm, 2.6 W) was used for visualization. NMR spectroscopy was done on Bruker Avance III 400, Bruker Avance III HDX 600, and Bruker Avance III HDX 700 spectrometers. Chemical shifts  $\delta$  are given in ppm, coupling constants  $J$  in hertz (Hz) and standard abbreviations are designated to the multiplicities of the signals. The spectra were calibrated with the solvent residual signals. High resolution mass spectrometry was done with electron spray ionization time of flight mass spectrometry (ESI-TOF-MS) on a maXis 4G Bruker system. UV/Vis absorption spectra were recorded on a PerkinElmer Lambda 1050 spectrometer with a PerkinElmer 3D WB Det Module in 1.0 cm quartz cuvettes, and samples were analyzed in CH<sub>2</sub>Cl<sub>2</sub> at room temperature. Steady-state excitation and emission spectra were recorded on a Horiba Fluorolog-3 DF spectrofluorimeter equipped with a 450 W Xe lamp, and samples were analysed in CH<sub>2</sub>Cl<sub>2</sub> at room temperature. Emission was monitored at a 90° angle using a Hamamatsu R2658P PMT (UV/Vis/NIR, 200 nm <  $\lambda_{em}$  < 1000 nm) detector. Spectral selection was achieved by the double grating monochromator 320DFX for excitation (1200 grooves/nm, blazed at 330 nm) and the single grating emission monochromator iHR550 for the visible path (1200 grooves/nm, blazed at 500 nm). For the lifetime measurements, a pulsed LED (Horiba DeltaDiode-310,  $\lambda_{em} = 308 \pm 10$  nm, pulse width ~1 ns FWHM,  $P_{avg} = 5 \mu W$ ) was used. Lifetime data analysis (least square fitting, statistical parameters, etc.) was performed using the software package DAS from Horiba. Lifetimes were determined from the decay curves by an iterative reconvolution fitting method using appropriate multi-exponential functions and taking the instruments response function into account. The instrument used for determination of absolute fluorescence quantum yields was a PerkinElmer FL 8500 Spectrophotometer equipped with a 150 W continuous Xe short arc lamp as excitation source and an integration sphere. Quantum yields were averaged over 4 independent experiments. CPL measurements were carried out with a home-made spectrofluoropolarimeter,<sup>1</sup> mounting a Hamamatsu R-376. The samples concentration was around  $2 \times 10^{-6}$  M in dichloromethane. A 365 nm LED was used as the excitation source, employing a 90° geometry. The excitation beam was horizontally polarized. Parameters: slit width = 5 nm, scan speed = 2 nm/sec, integration time = 2 sec, PMT voltage = 550 V, accumulations = 4. The solvent baseline was subtracted from the CPL spectra. ECD spectra were recorded with a Jasco J-1500 spectropolarimeter in dichloromethane solution. The spectra were baseline corrected. All measurements were done in spectroscopy grade solvents.

**Materials.** NBN-Benzo[*f,g*]tetracene (**3**),<sup>2</sup> 1-bromo-3,9-dibutyl-NBN-benzo[*f,g*]tetracene (**5**),<sup>3,4</sup> (*R*)-/(*S*)-3,3'-diiodo-2,2'-dimethoxy-1,1'-binaphthalene,<sup>5</sup> and (*R*)-/(*S*)-3,3'-diethynyl-2,2'-dimethoxy-1,1'-binaphthalene ((*R*)-/(*S*)-**6**)<sup>6</sup> were prepared according to literature procedures.

## Synthetic Procedures.

### 3-Bromo-NBN-benzo[*f,g*]tetracene (4)

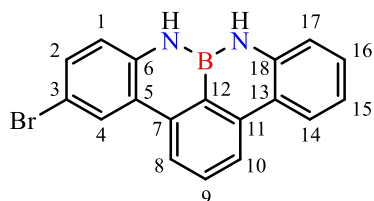

Under ambient conditions, NBN-benzo[*f,g*]tetracene (697 mg, 2.60 mmol, 1.18 eq) is dissolved in acetonitrile (330 ml) and THF (40 ml). The solution is cooled to 0°C and a solution of NBS (393 mg, 2.21 mmol, 1.00 eq) in acetonitrile (20 ml) is added all at once. The cooling bath is not removed, but no additional ice is added so that the solution is allowed to slowly warm to r.t. over night. The mixture is concentrated under reduced pressure, redissolved in ethyl acetate (80 ml), and is transferred to a separation funnel. The organic phase is washed with saturated NaHCO<sub>3</sub> (80 ml), water (80 ml), and brine (50 ml), dried over MgSO<sub>4</sub> and is filtered. Silica is added and the solvent is removed under reduced pressure. The crude product is applied to silica gel chromatography (THF 2/5 hexanes, R<sub>f</sub> = 0.24 in THF 1/2 hexanes) and the product is obtained as a colourless solid (550 mg, 1.59 mmol, 72 %).

<sup>1</sup>H NMR (400 MHz, CD<sub>2</sub>Cl<sub>2</sub>): 8.34 (d, <sup>3</sup>J = 2.2 Hz, 1H, H-4), 8.24 (dd, <sup>3</sup>J = 8.1, <sup>4</sup>J = 1.5 Hz, 1H, H14), 8.21 (d, <sup>3</sup>J = 8.0 Hz, 1H, H10), 8.10 (d, <sup>3</sup>J = 8.0 Hz, 1H, H8), 7.82 (vt, <sup>3</sup>J = 8.0 Hz, 1H, H9), 7.39 (dd, <sup>3</sup>J = 8.5, <sup>4</sup>J = 2.2 Hz, 1H, H2), 7.36—7.31 (m, 1H, H16), 7.13—7.09 (m, 1H, H15), 7.09—7.06 (m, 1H, H17), 6.96 (d, <sup>3</sup>J = 8.5 Hz, 1H, H1), 6.49—6.36 (m, 2H, NH) ppm; <sup>13</sup>C{<sup>1</sup>H} NMR (101 MHz, CD<sub>2</sub>Cl<sub>2</sub>): δ 141.0 (C18), 140.3 (C6), 139.6 (C11), 138.3 (C7), 131.7 (C9), 131.5 (C2), 129.1 (C16), 127.6 (C4), 124.9 (C14), 124.7 (C5), 122.5 (C13), 120.7 (C15), 120.4 (C1), 120.2 (C10), 119.6 (C8), 118.9 (C17), 112.7 (C3) ppm; <sup>11</sup>B{<sup>1</sup>H} NMR (128 MHz, CD<sub>2</sub>Cl<sub>2</sub>): δ 26.8 ppm.

### 3,9-Dibromo-NBN-benzo[*f,g*]tetracene

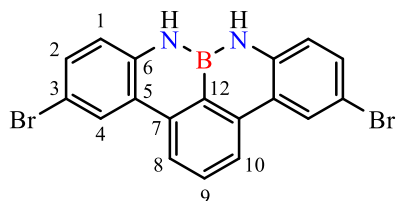

Under ambient conditions, NBN-benzo[*f,g*]tetracene (500 mg, 1.86 mmol, 1.00 eq) is dissolved in acetonitrile (270 ml) and THF (35 ml). NBS (663 mg, 3.73 mmol, 2.00 eq) is added at r.t. and the reaction mixture is stirred overnight. The solvent is removed under reduced pressure and the residue is suspended in acetonitrile (80 ml) and is treated with ultrasound for 5 min. Filtration and washing with acetonitrile (2×25 ml), water (2×25 ml), and MeOH (30 ml) yields the desired product as a colourless solid (500 mg, 1.17 mmol, 63 %).

<sup>1</sup>H NMR (400 MHz, THF-*d*<sub>8</sub>): δ 8.38 (d, <sup>4</sup>J = 2.2 Hz, 2H, H4), 8.21 (d, <sup>3</sup>J = 8.0 Hz, 2H, H8), 7.78 (t, <sup>3</sup>J = 8.0 Hz, 1H, H9), 7.35 (dd, <sup>3</sup>J = 8.6 Hz, <sup>4</sup>J = 2.2 Hz, 2H, H2), 7.05 (d, <sup>3</sup>J = 8.6 Hz, 2H, H1) ppm; <sup>13</sup>C{<sup>1</sup>H} NMR (101 MHz, THF-*d*<sub>8</sub>): δ 141.7 (C6), 139.1 (C7), 132.0 (C9), 131.8 (C2), 127.9 (C4), 128.4 (C10), 125.2 (C5), 121.0 (C1), 120.6 (C8), 112.8 (C3) ppm; <sup>11</sup>B{<sup>1</sup>H} NMR (128 MHz, CD<sub>2</sub>Cl<sub>2</sub>): δ 26.9 ppm.

**(R)-/(S)-3,3'-Bis(NBN-benzo[*f,g*]tetracen-3-yl-ethynyl)-2,2'-dimethoxy-1,1'-binaphthalene (**1**)**

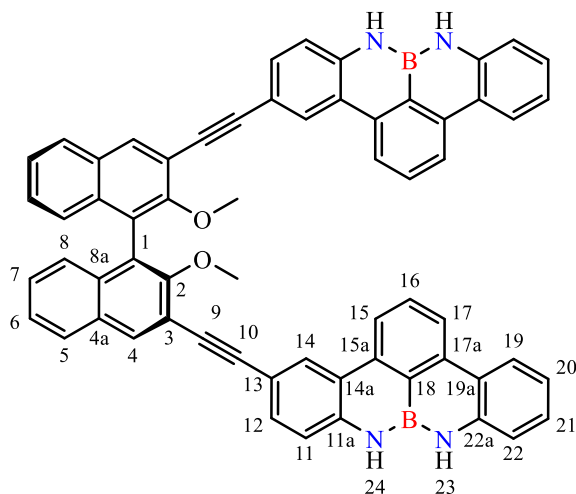

**(R)-6** (58.0 mg, 0.160 mmol, 1.00 eq), **1** (122 mg, 0.352 mmol, 2.20 eq), Pd<sub>2</sub>(dba)<sub>3</sub> (10.3 mg, 11.2 μmol, 0.07 eq), CuI (4.3 mg, 22.4 μmol, 0.14 eq), and (*t*-Bu)<sub>3</sub>PH×BF<sub>4</sub> (13.0 mg, 44.8 μmol, 0.28 eq) are suspended in dry, degassed THF/Et<sub>3</sub>N (6 ml, 1/1 v/v). The reaction mixture is stirred at 55°C for 40 h. The mixture is allowed to cool to r.t. and the solvent is removed under reduced pressure. The complex product mixture is purified by a series of chromatographic methods. First, silica gel chromatography (THF 2/1 hexane) is performed and the product fraction is applied to a recycling-GPC device using THF as eluent. The obtained two component fraction containing the product is separated by a final silica gel chromatography (CH<sub>2</sub>Cl<sub>2</sub> 6/1 hexanes, R<sub>f</sub> = 0.32) yielding the product **(R)-1** as a pale yellow solid (59 mg, 66 μmol, 41 %). [α]<sub>589</sub><sup>20</sup> – 349° (c 0.10, CHCl<sub>3</sub>).

**(S)-1** is obtained by a similar procedure starting from **(S)-6**. [α]<sub>589</sub><sup>20</sup> + 354° (c 0.10, CHCl<sub>3</sub>).

<sup>1</sup>H NMR (700 MHz, CD<sub>2</sub>Cl<sub>2</sub>): δ 8.51 (d, <sup>4</sup>J = 1.8 Hz, 2H, H14), 8.30 (s, 2H, H4), 8.28 – 8.24 (m, 2H, H19), 8.22 (d, <sup>3</sup>J = 8.0 Hz, 4H, H15+ H17), 7.95 (d, <sup>3</sup>J = 8.2 Hz, 2H, H5), 7.84 (t, <sup>3</sup>J = 8.0 Hz, 2H, H16), 7.56 (dd, <sup>3</sup>J = 8.3, <sup>4</sup>J = 1.8 Hz, 2H, H12), 7.49 – 7.42 (m, 2H, H6), 7.37 – 7.32 (m, 2H, H21), 7.32 – 7.27 (m, 2H, H7), 7.20 – 7.14 (m, 2H, H8), 7.14 – 7.06 (m, 6H, H11+H20+H22), 6.53 (bs, 2H, NH), 6.48 (bs, 2H, NH), 3.84 (s, 6H, OMe) ppm; <sup>13</sup>C{<sup>1</sup>H} NMR (176 MHz, CD<sub>2</sub>Cl<sub>2</sub>): δ 156.1 (C2), 141.8 (C11a), 141.0 (C22a), 139.6 (C17a), 138.7 (C15a), 134.3 (C4), 134.2 (C8a), 132.1 (C12), 131.8 (C16), 131.0 (C4a), 129.1 (C21), 128.5 (C14), 128.4 (C5), 127.6 (C7), 127.5 (C18), 126.2 (C8), 126.0 (C6), 125.6 (C1), 124.9 (C19), 123.0 (C14a), 122.7 (C19a), 120.7 (C20), 120.1 (C15), 119.7 (C17), 119.1 (C11), 118.9 (C22), 118.3 (C3), 115.0 (C13), 95.3 (C10), 85.4 (C9), 61.7 (OMe) ppm; HRMS-ESI calcd for C<sub>62</sub>H<sub>40</sub>B<sub>2</sub>N<sub>4</sub>O<sub>2</sub>Na [M+Na]<sup>+</sup>: 917.32484, found: 917.32597 m/z.

**(R)-/(S)-3,3'-Bis(3,9-dibutyl-NBN-benzo[*f,g*]tetracen-1-yl-ethynyl)-2,2'-dimethoxy-1,1'-binaphthalene (**2**)**

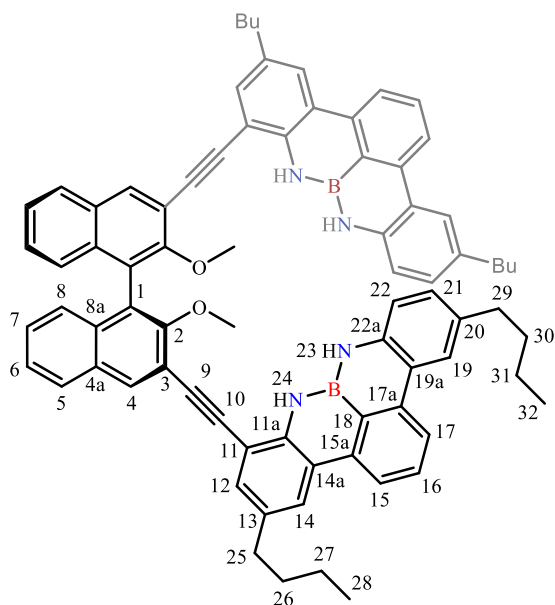

**(R)-6** (58.0 mg, 0.160 mmol, 1.00 eq), **2** (162 mg, 0.352 mmol, 2.20 eq), Pd<sub>2</sub>(dba)<sub>3</sub> (10.3 mg, 11.2 μmol, 0.07 eq), CuI (4.3 mg, 22.4 μmol, 0.14 eq), and (*t*-Bu)<sub>3</sub>PH×BF<sub>4</sub> (13.0 mg, 44.8 μmol, 0.28 eq) are suspended in dry, degassed THF/Et<sub>3</sub>N (6 ml, 1/1 v/v). The reaction mixture is stirred at 55°C for 16 h. The mixture is allowed to cool to r.t. and the solvent is removed under reduced pressure. The complex product mixture is purified by a series of chromatographic methods. First, silica gel chromatography (THF/toluene/cyclohexane 1/34/65) is performed and the product fraction is applied to a recycling-GPC device (twice) using CHCl<sub>3</sub> as eluent. The product **(R)-2** is obtained as a yellow film (64 mg, 58 μmol, 36 %). [α]<sub>589</sub><sup>20</sup> – 328° (c 0.50, CHCl<sub>3</sub>).

**(S)-2** is obtained by a similar procedure starting from **(S)-6**. [α]<sub>589</sub><sup>20</sup> + 325° (c 0.50, CHCl<sub>3</sub>).

**<sup>1</sup>H NMR** (700 MHz, CD<sub>2</sub>Cl<sub>2</sub>): δ 8.40 (s, 2H, H4), 8.17 (d, <sup>3</sup>J = 8.0 Hz, 2H, H15), 8.14 (d, <sup>3</sup>J = 8.0 Hz, 2H, H17), 8.10 (d, <sup>4</sup>J = 1.9 Hz, 2H, H14), 8.03 (d, <sup>3</sup>J = 8.1 Hz, 2H, H5), 7.94 (d, <sup>4</sup>J = 1.8 Hz, 2H, H19), 7.86 (s, 2H, NH24), 7.79 (vt, <sup>3</sup>J = 8.0 Hz, 2H, H16), 7.59 – 7.51 (m, 2H, H6), 7.50 (d, <sup>4</sup>J = 1.9 Hz, 2H, H12), 7.42 – 7.35 (m, 2H, H7), 7.32 – 7.27 (m, 2H, H8), 6.94 (dd, <sup>3</sup>J = 8.1, <sup>4</sup>J = 1.8 Hz, 2H, H21), 6.84 (d, <sup>3</sup>J = 8.1 Hz, 2H, H22), 6.36 (s, 2H, NH23), 3.78 (s, 6H, OMe), 2.79 – 2.69 (m, 4H, H25), 2.62 – 2.54 (m, 4H, H29), 1.78 – 1.65 (m, 4H, H26), 1.60 – 1.50 (m, 4H, H30), 1.50 – 1.39 (m, 4H, H27), 1.39 – 1.29 (m, 4H, H31), 1.01 – 0.96 (m, 6H, H28), 0.94 – 0.89 (m, 6H, H32) ppm; **<sup>13</sup>C{<sup>1</sup>H} NMR** (176 MHz, CD<sub>2</sub>Cl<sub>2</sub>): δ 156.3 (C2), 141.0 (C11a), 139.7 (C17a), 139.2 (C15a), 138.9 (C22a), 134.8 (C20), 134.4 (C8a), 134.1 (C4), 134.0 (C13), 131.4 (C16), 131.2 (C12), 131.2 (C4a), 129.3 (C21), 128.7 (C5), 128.1 (C7), 127.7 (C18), 126.4 (C6+C8), 125.9 (C14), 125.5 (C1), 124.2 (C19), 122.6 (C14a), 122.2 (C19a), 119.6 (C15), 119.4 (C17), 118.8 (C22), 118.0 (C3), 111.5 (C11), 93.3 (C9), 91.9 (C10), 62.0 (OMe), 35.8 (C29), 35.7 (C25), 34.7 (C30), 34.6 (C26), 22.9 (C27+C31), 14.4 (C32), 14.3 (C28) ppm; **HRMS-ESI** calcd for C<sub>78</sub>H<sub>73</sub>B<sub>2</sub>N<sub>4</sub>O<sub>2</sub> [M+H]<sup>+</sup>: 1119.59367, found: 1119.59472 m/z.

## 2. Spectra: NMR & mass

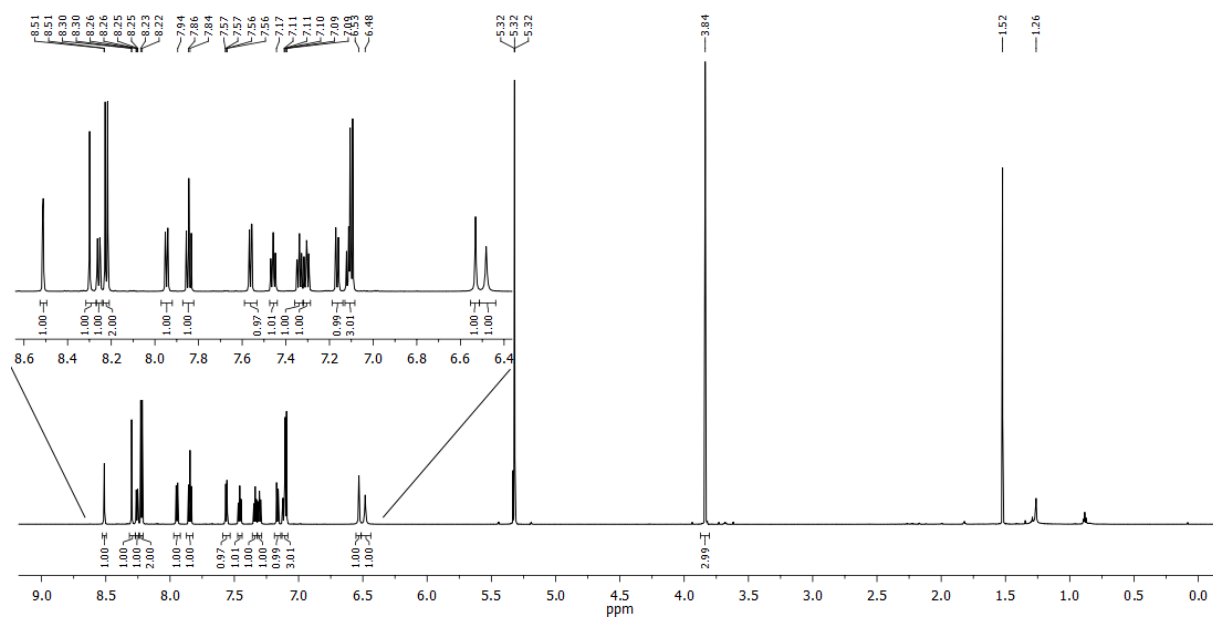

Figure S1.  $^1\text{H}$  NMR (700 MHz,  $\text{CD}_2\text{Cl}_2$ ) of (S)-1.

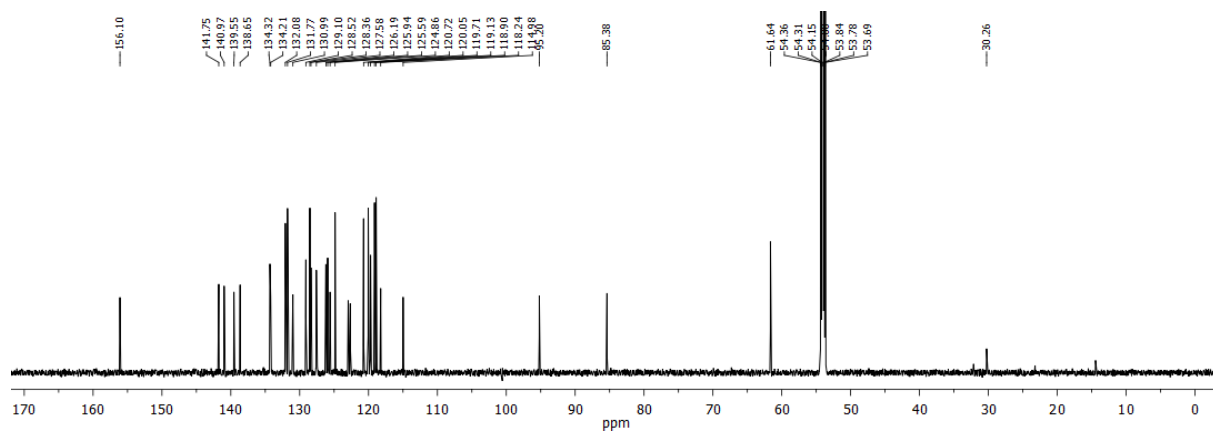

Figure S2.  $^{13}\text{C}\{^1\text{H}\}$  NMR (176 MHz,  $\text{CD}_2\text{Cl}_2$ ) of (S)-1.

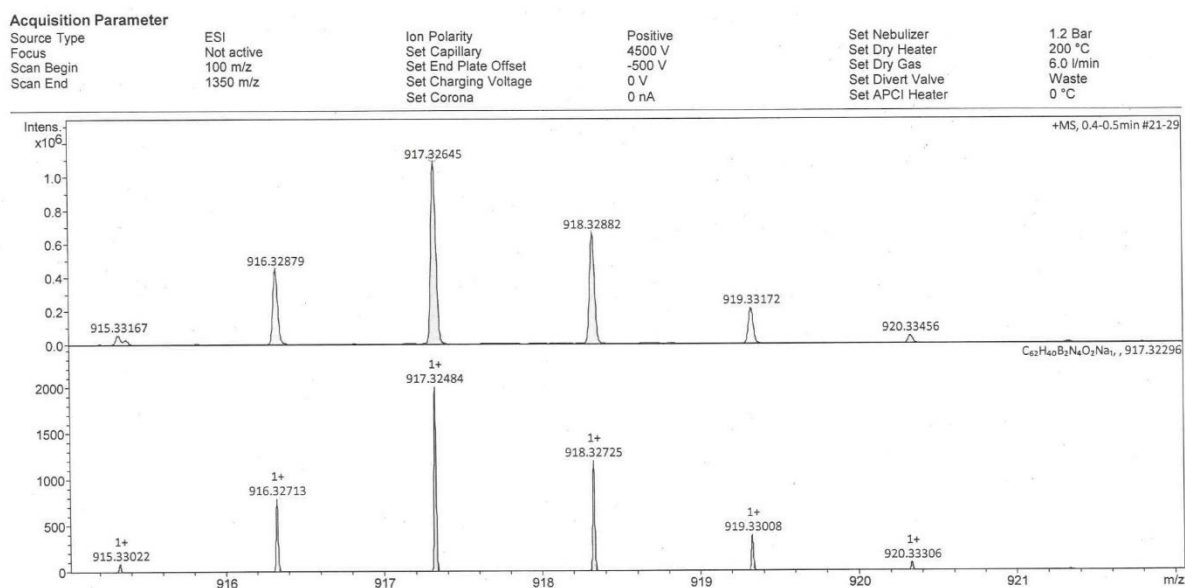

**Figure S3.** Experimental HR ESI-MS of (*S*)-**1** (top) and theoretical isotopic envelopes for  $C_{62}H_{40}B_2N_4O_2Na$   $[M+Na]^+$  (bottom).  $m/z$   $[M+Na]^+$  calculated for  $C_{62}H_{40}B_2N_4O_2Na$ : 917.32484; found: 917.32645 ( $\Delta$ : 1.76 ppm).

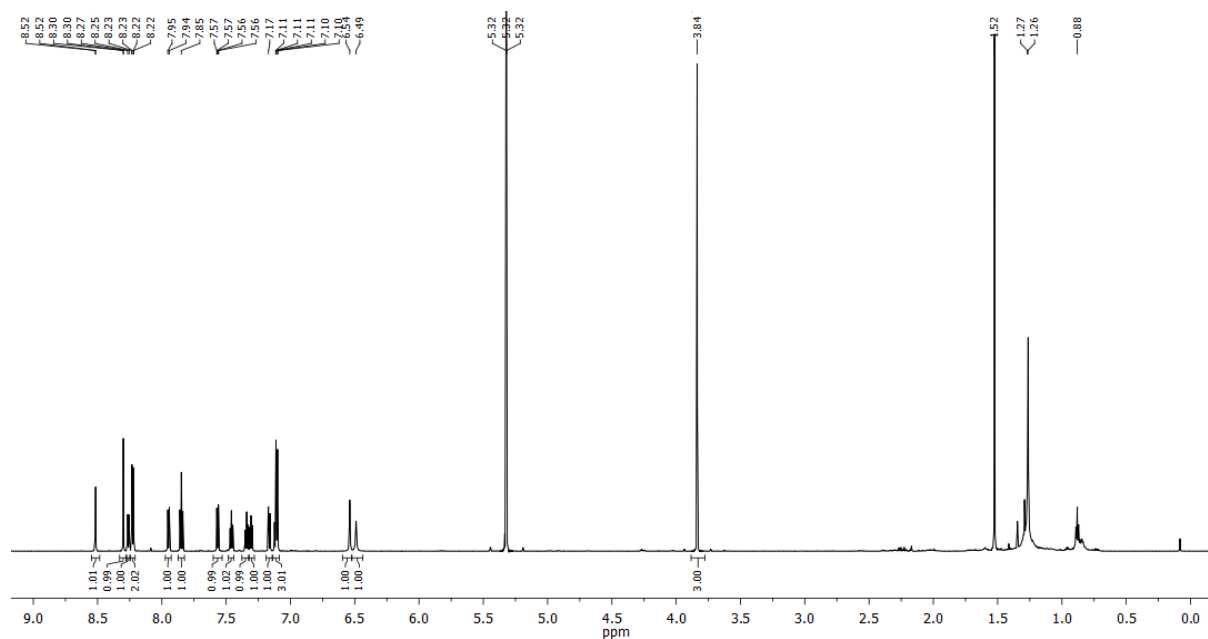

**Figure S4.**  $^1H$  NMR (700 MHz,  $CD_2Cl_2$ ) of (*R*)-**1**.

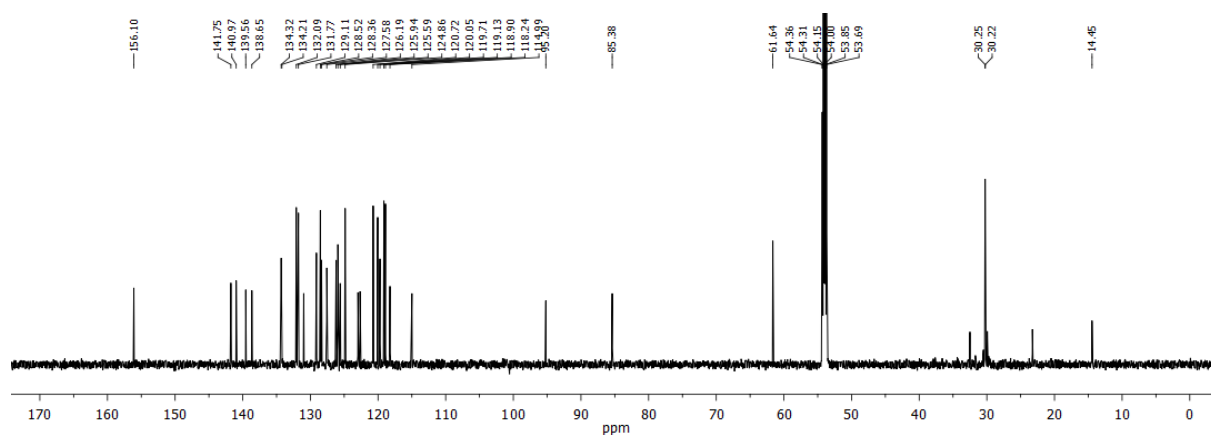

**Figure S5.**  $^{13}\text{C}\{^1\text{H}\}$  NMR (176 MHz,  $\text{CD}_2\text{Cl}_2$ ) of (*R*)-**1**.

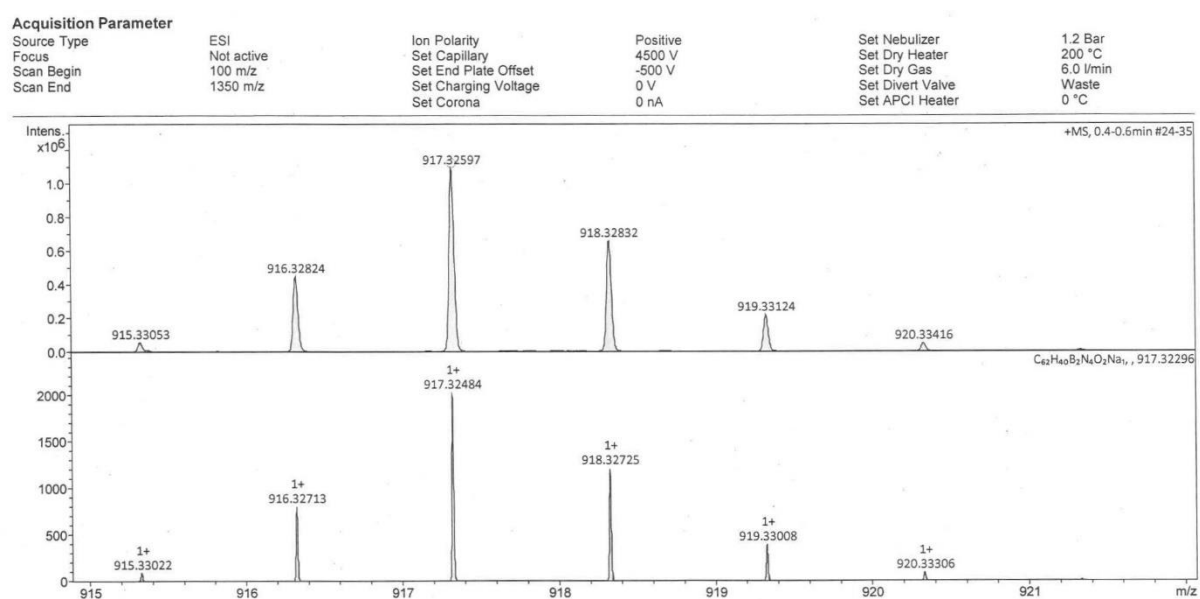

**Figure S6.** Experimental HR ESI-MS of (*R*)-**1** (top) and theoretical isotopic envelopes for  $\text{C}_{62}\text{H}_{40}\text{B}_2\text{N}_4\text{O}_2\text{Na}$   $[\text{M}+\text{Na}]^+$  (bottom).  $m/z$   $[\text{M}+\text{Na}]^+$  calculated for  $\text{C}_{62}\text{H}_{40}\text{B}_2\text{N}_4\text{O}_2\text{Na}$ : 917.32484; found: 917.32597 ( $\Delta$ : 1.23 ppm).



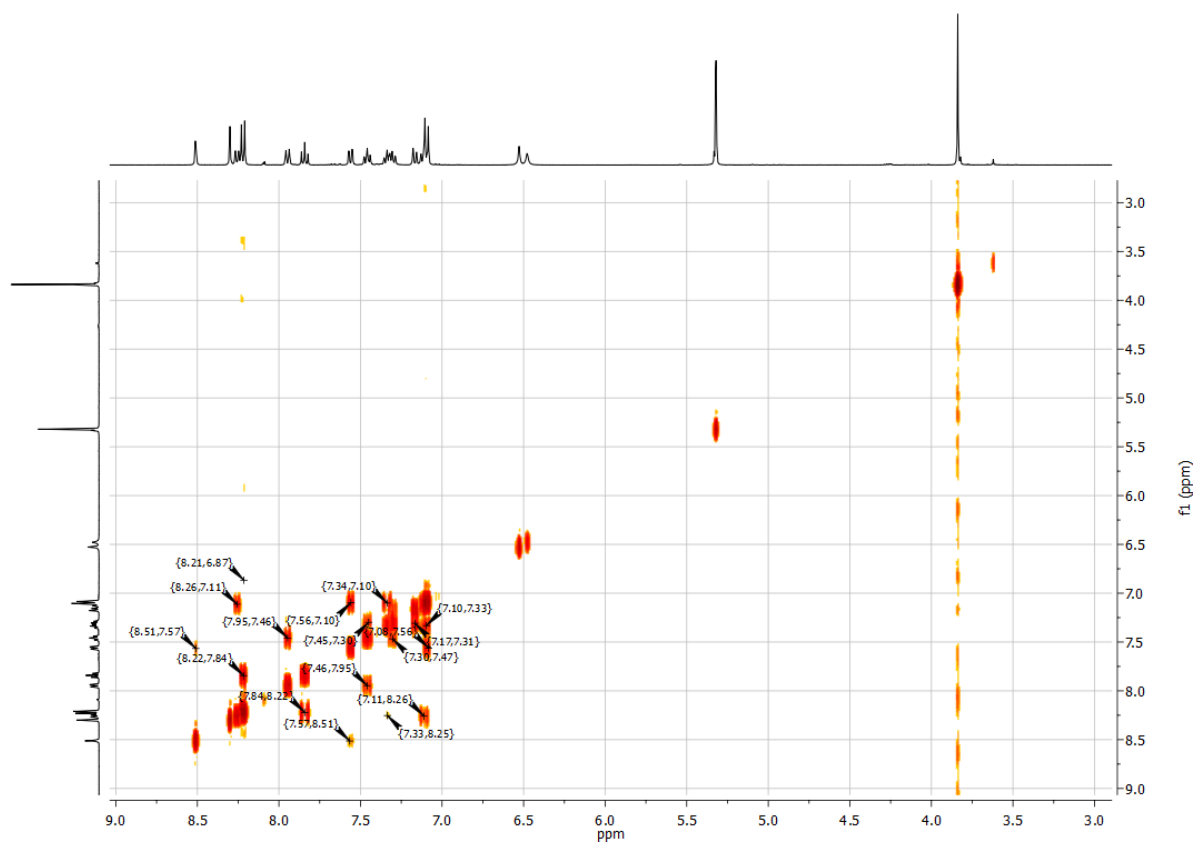

Figure S7. H-H-COSY NMR (400 MHz, CD<sub>2</sub>Cl<sub>2</sub>) of (*R*)-1.

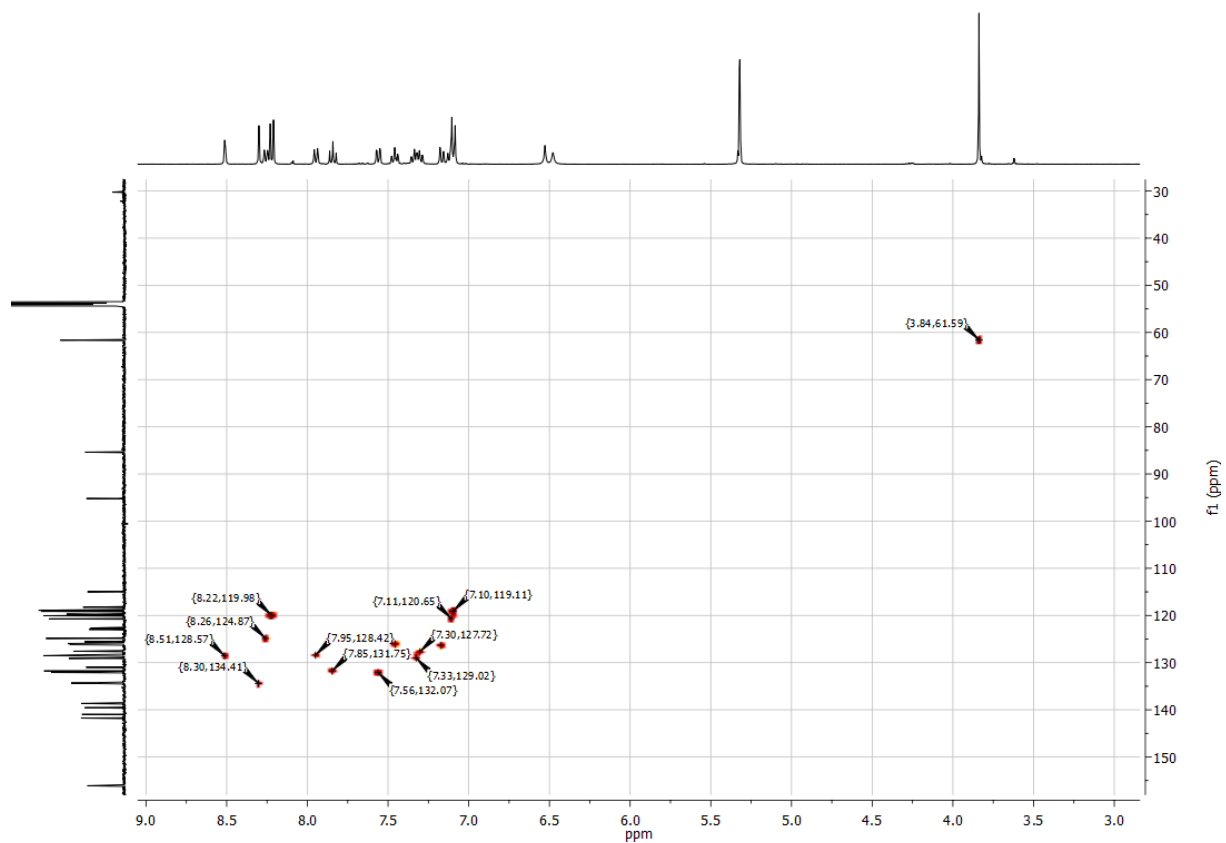

Figure S8. HSQC NMR (400 {101} MHz, CD<sub>2</sub>Cl<sub>2</sub>) of (*R*)-1.

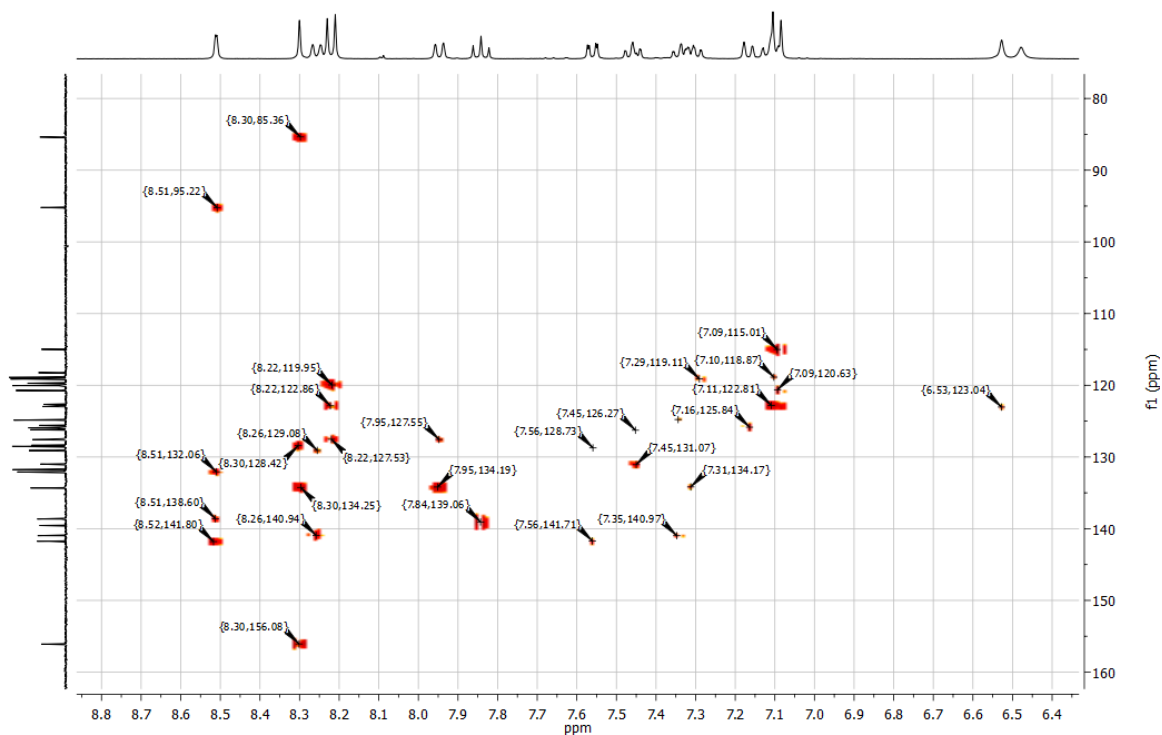

Figure S9. HMBC NMR (400 {101} MHz,  $\text{CD}_2\text{Cl}_2$ ) of (*R*)-1.

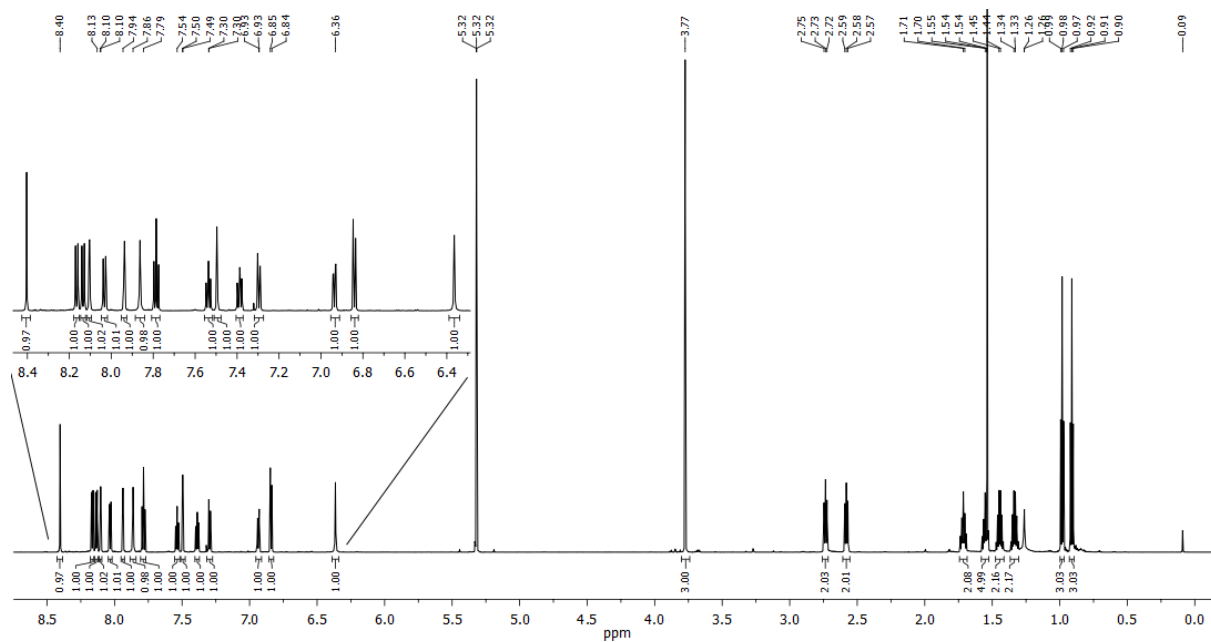

Figure S10.  $^1\text{H}$  NMR (700 MHz,  $\text{CD}_2\text{Cl}_2$ ) of (*S*)-2.

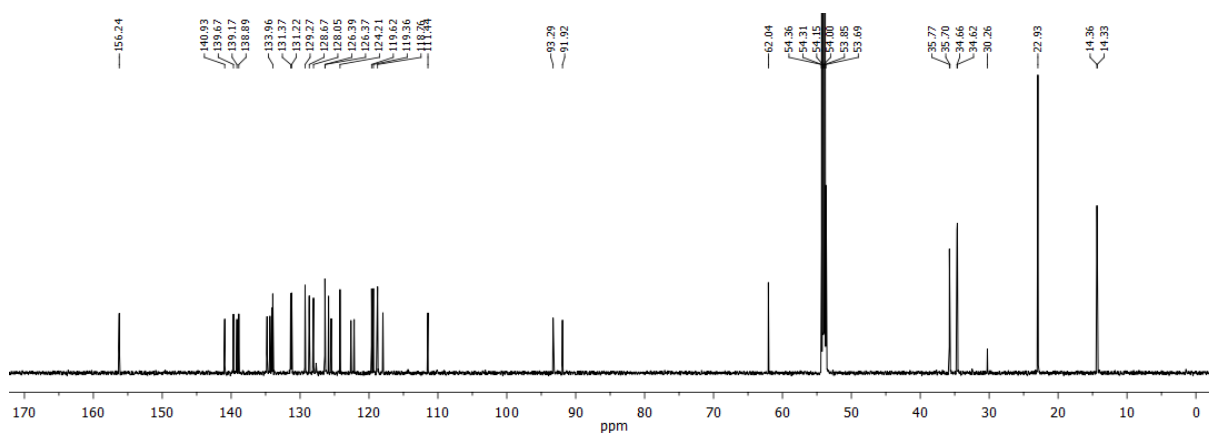

**Figure S11.**  $^{13}\text{C}\{^1\text{H}\}$  NMR (176 MHz,  $\text{CD}_2\text{Cl}_2$ ) of (*S*)-**2**.

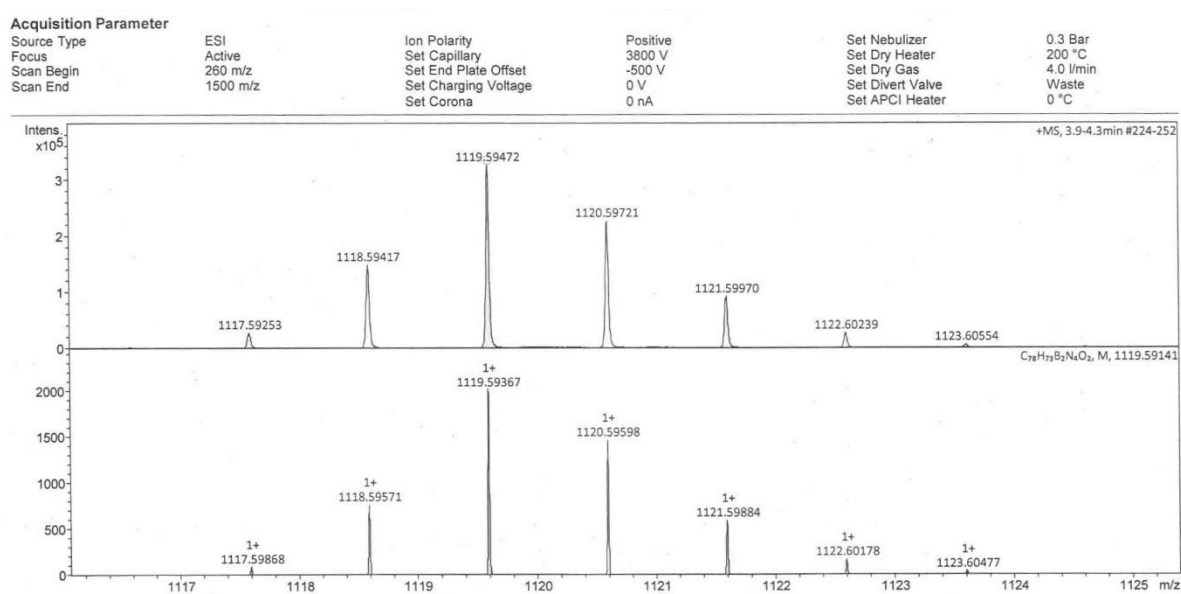

**Figure S12.** Experimental HR ESI-MS of (*S*)-**2** (top) and theoretical isotopic envelopes for  $\text{C}_{78}\text{H}_{73}\text{B}_2\text{N}_4\text{O}_2$   $[\text{M}+\text{H}]^+$  (bottom).  $m/z$   $[\text{M}+\text{H}]^+$  calculated for  $\text{C}_{78}\text{H}_{73}\text{B}_2\text{N}_4\text{O}_2$ : 1119.59367; found: 1119.59472 ( $\Delta$ : 0.94 ppm).

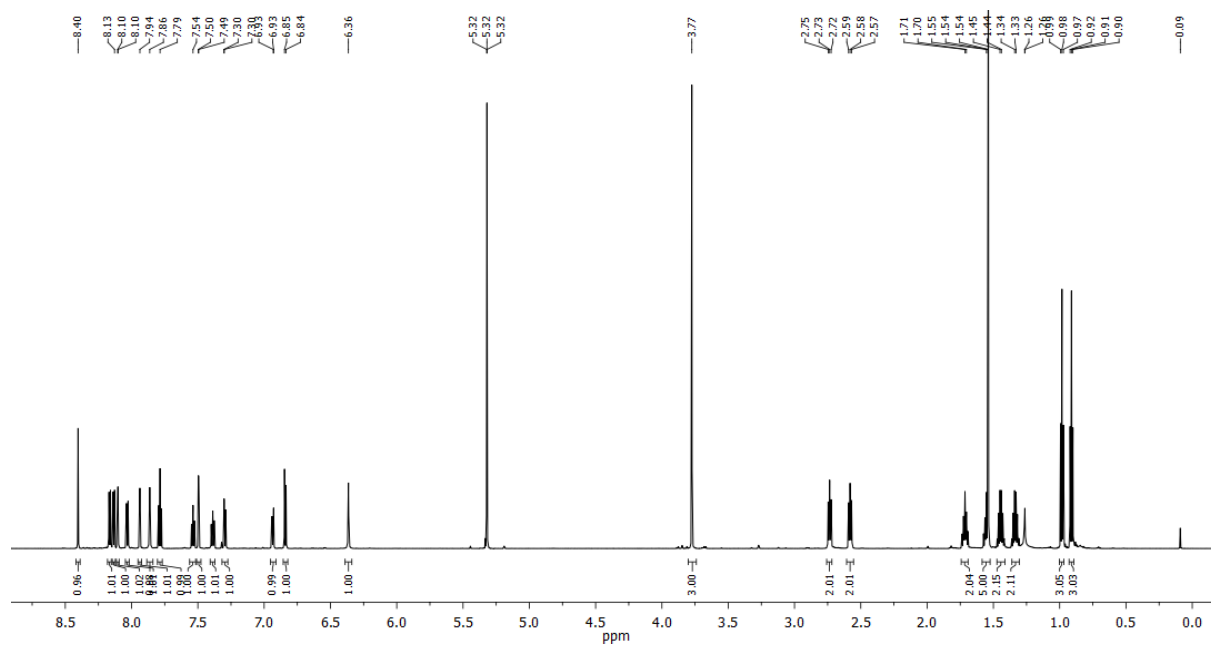

Figure S13.  $^1\text{H}$  NMR (700 MHz,  $\text{CD}_2\text{Cl}_2$ ) of **(R)-2**.

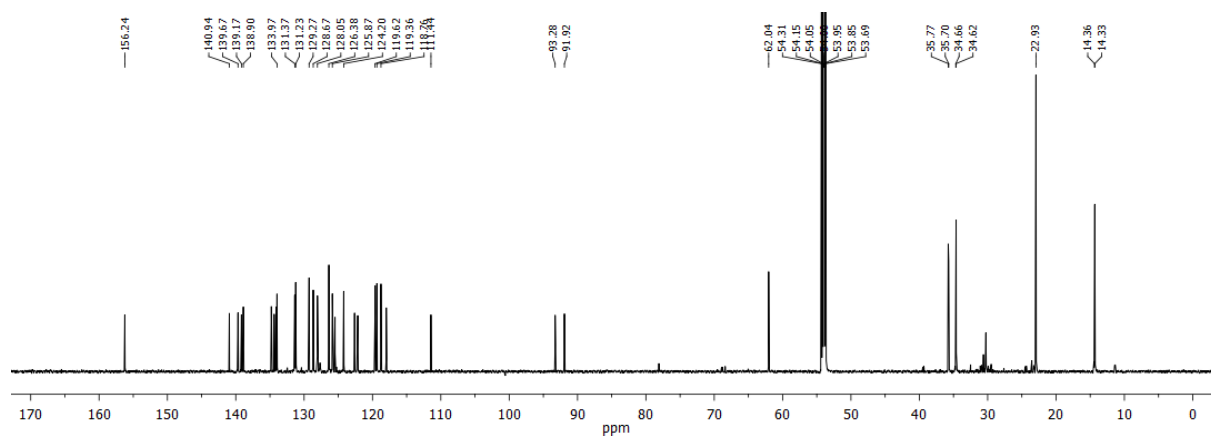

Figure S14.  $^{13}\text{C}\{^1\text{H}\}$  NMR (176 MHz,  $\text{CD}_2\text{Cl}_2$ ) of **(R)-2**.

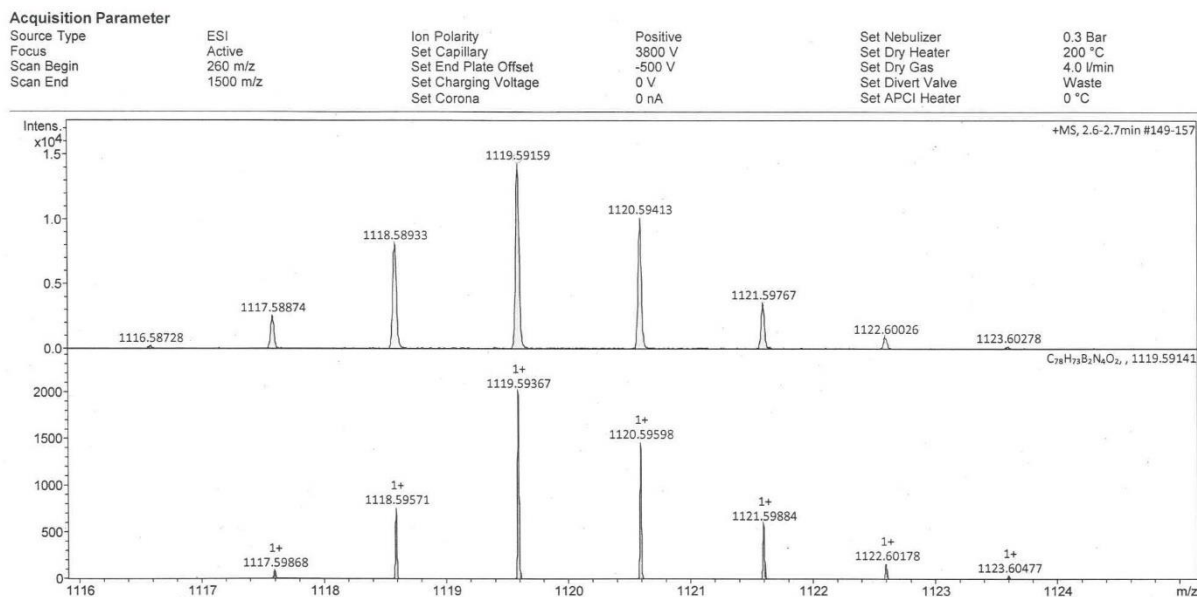

**Figure S15.** Experimental HR ESI-MS of (*R*)-**2** and theoretical isotopic envelopes for  $C_{78}H_{73}B_2N_4O_2$   $[M+H]^+$  (bottom).  $m/z$   $[M+H]^+$  calculated for  $C_{78}H_{73}B_2N_4O_2$ : 1119.59367; found: 1119.59159 ( $\Delta$ : 1.86 ppm).

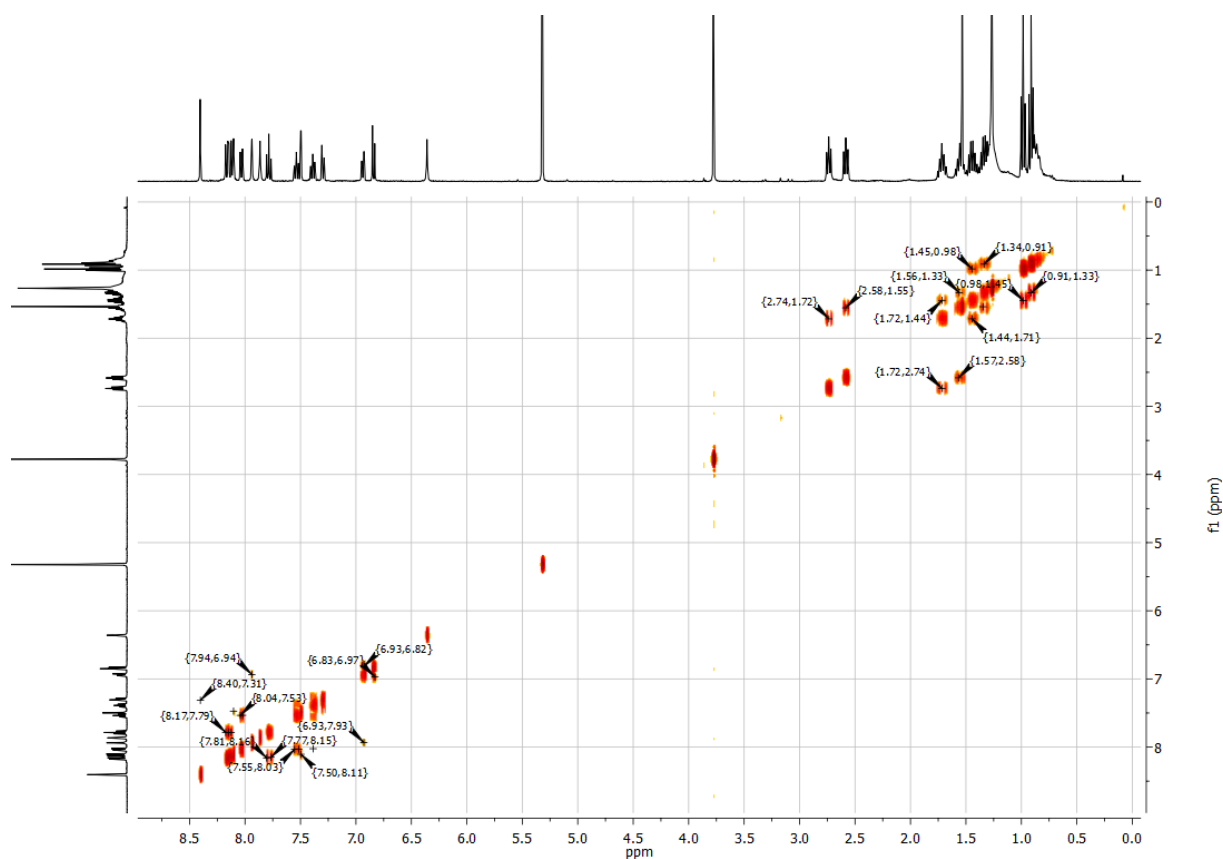

**Figure S16.** H-H-COSY NMR (400 MHz,  $CD_2Cl_2$ ) of (*R*)-**2**.

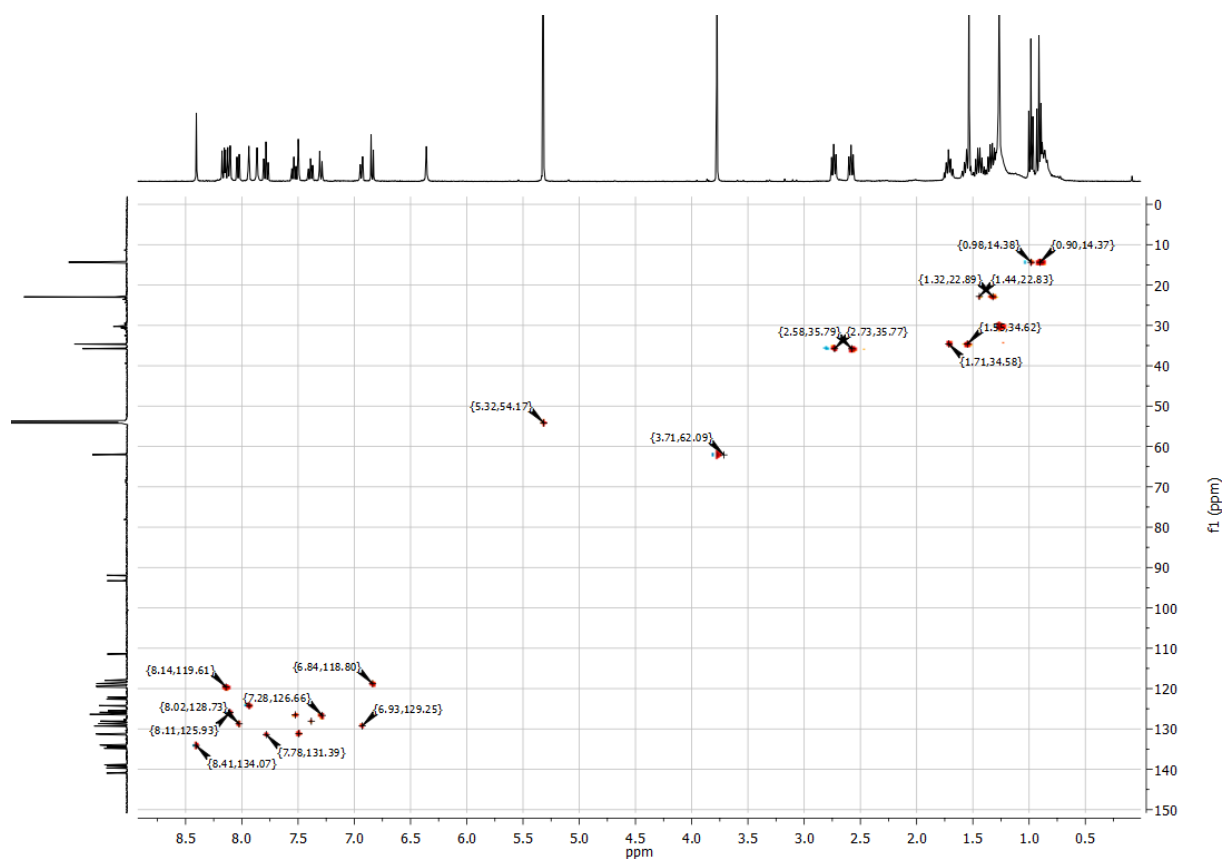

Figure S17. HSQC NMR (400 {101} MHz, CD<sub>2</sub>Cl<sub>2</sub>) of (*R*)-2.

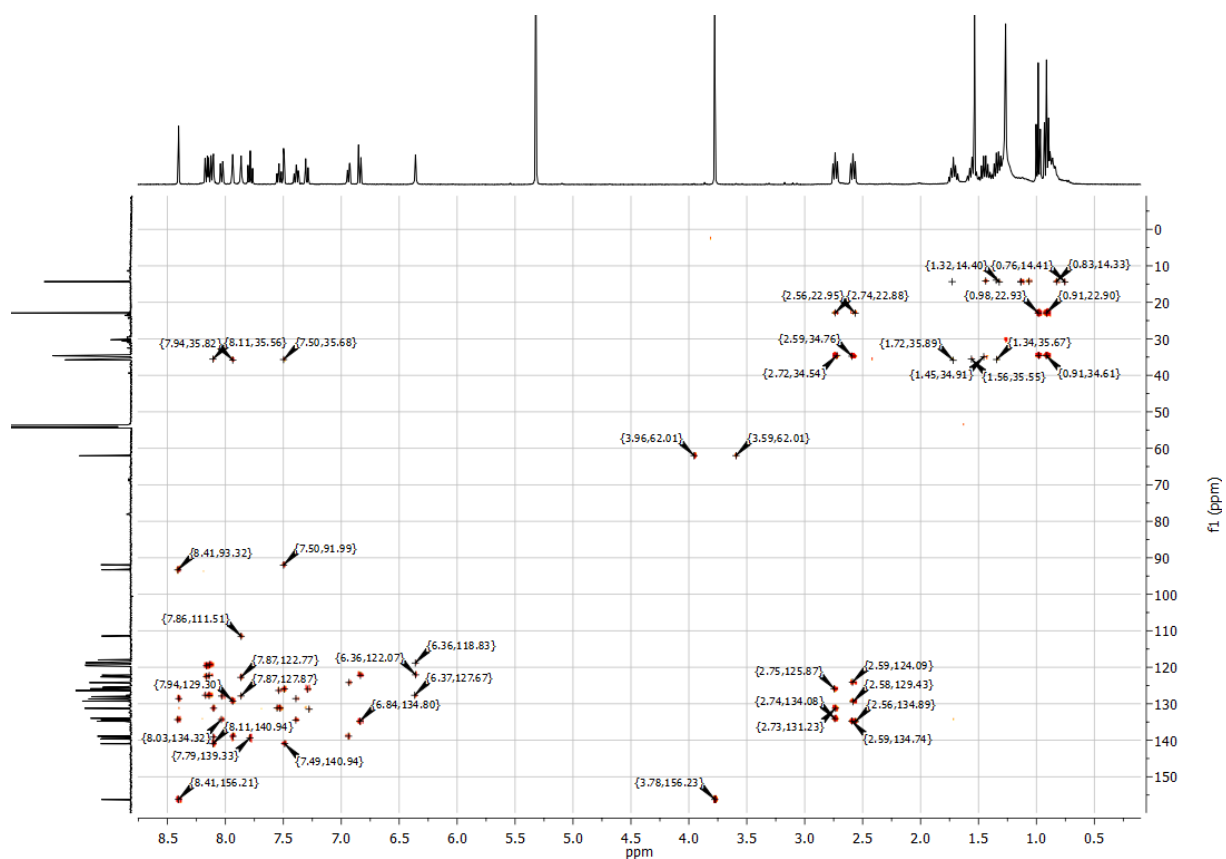

Figure S18. HMBC NMR (400 {101} MHz, CD<sub>2</sub>Cl<sub>2</sub>) of (*R*)-2.

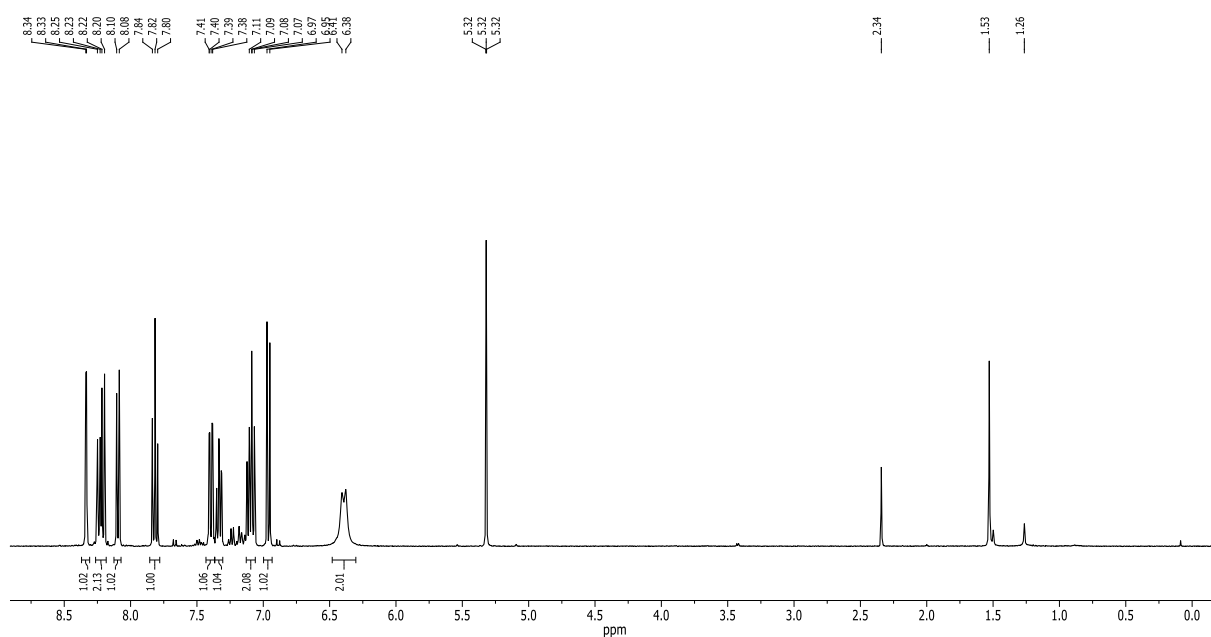

**Figure S19.**  $^1\text{H}$  NMR (400 MHz,  $\text{CD}_2\text{Cl}_2$ ) of **4**.

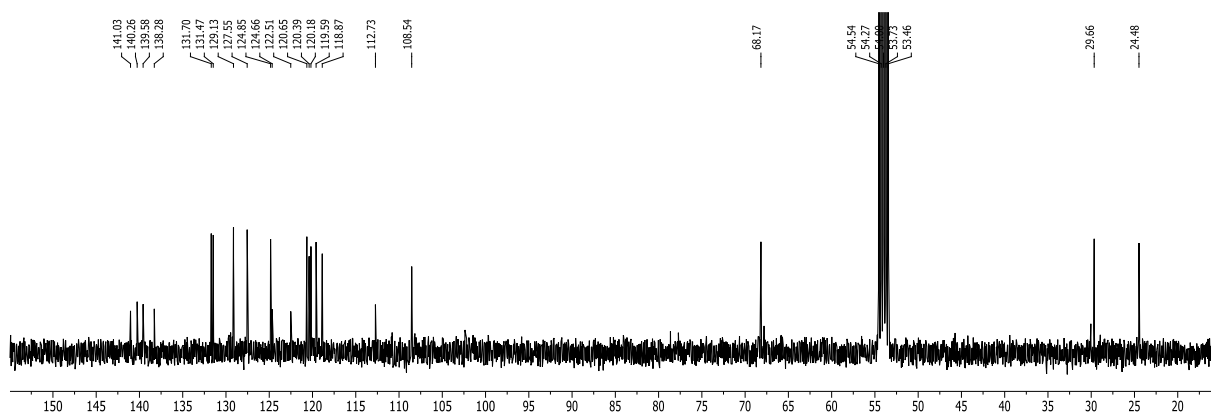

**Figure S20.**  $^{13}\text{C}\{^1\text{H}\}$  NMR (101 MHz,  $\text{CD}_2\text{Cl}_2$ ) of **4**.

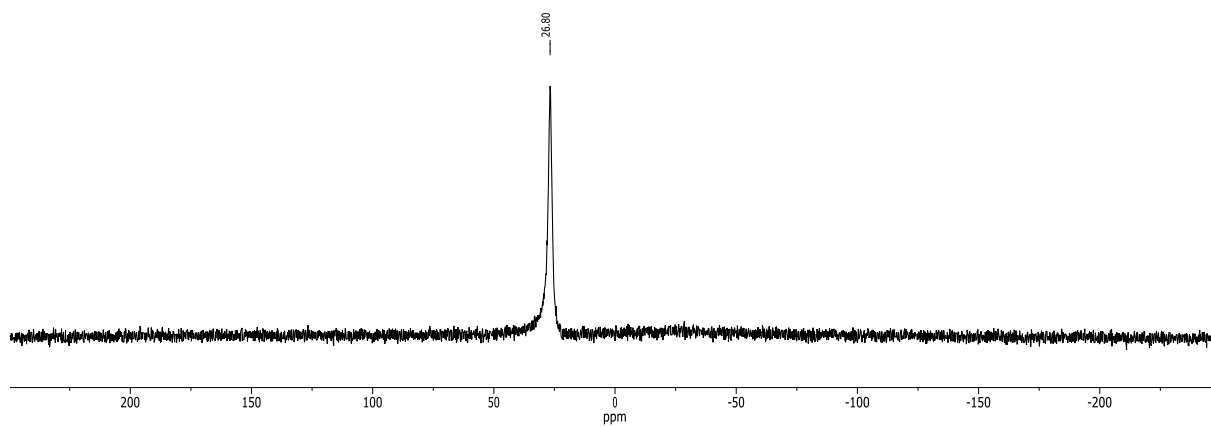

**Figure S21.**  $^{11}\text{B}\{^1\text{H}\}$  NMR (128 MHz,  $\text{CD}_2\text{Cl}_2$ ) of **4**.

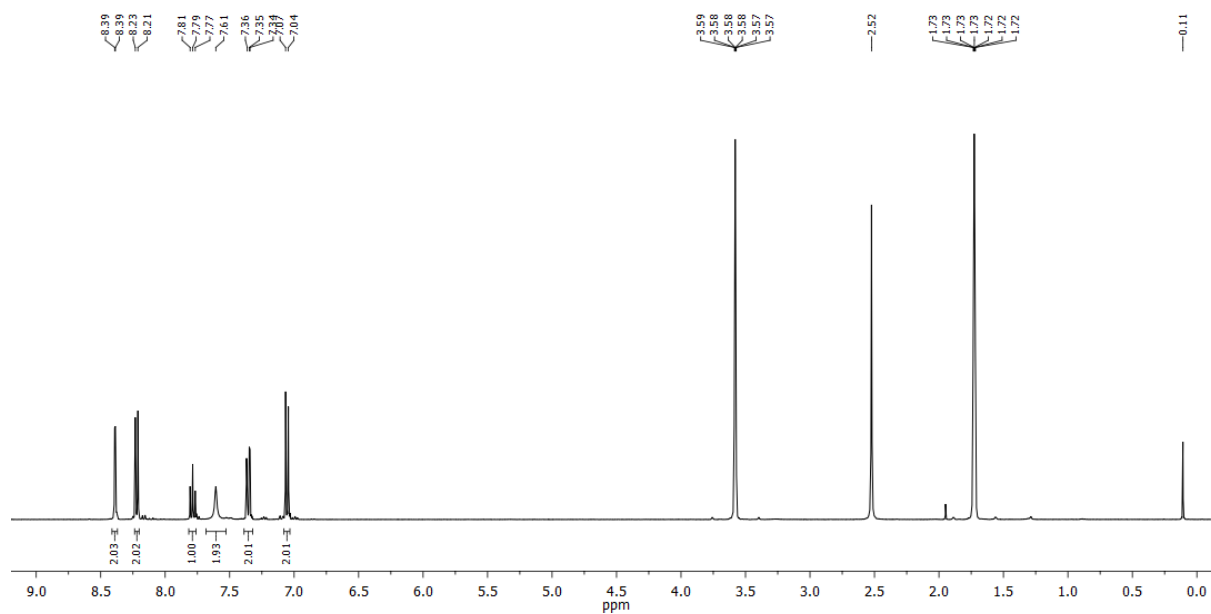

**Figure S22.**  $^1\text{H}$  NMR (400 MHz,  $\text{THF-}d_8$ ) of 3,9-dibromo-NBN-benzo[*f,g*]tetracene.

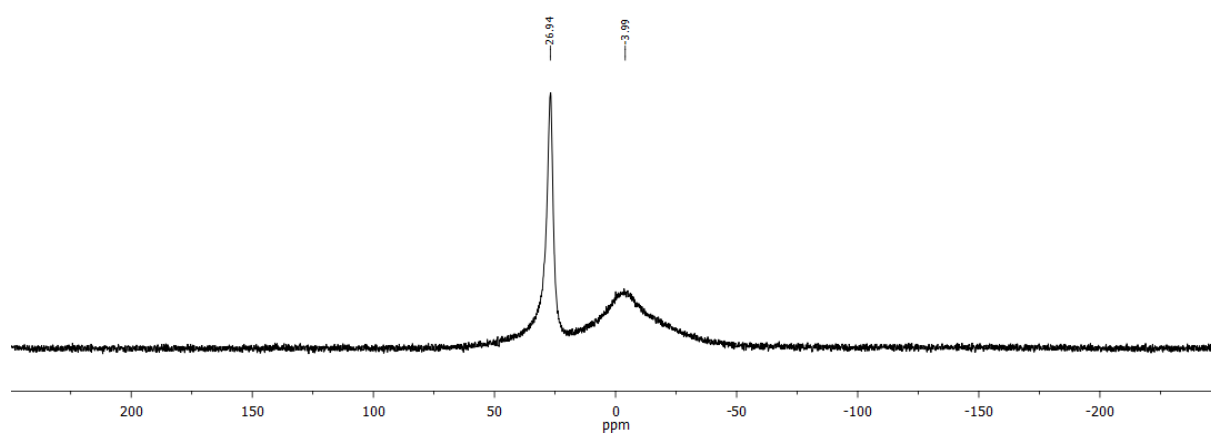

**Figure S23.**  $^{11}\text{B}\{^1\text{H}\}$  NMR (128 MHz,  $\text{THF-}d_8$ ) of 3,9-dibromo-NBN-benzo[*f,g*]tetracene. The broad signal at -3.99 ppm is related to the boron-silica NMR glass tube.



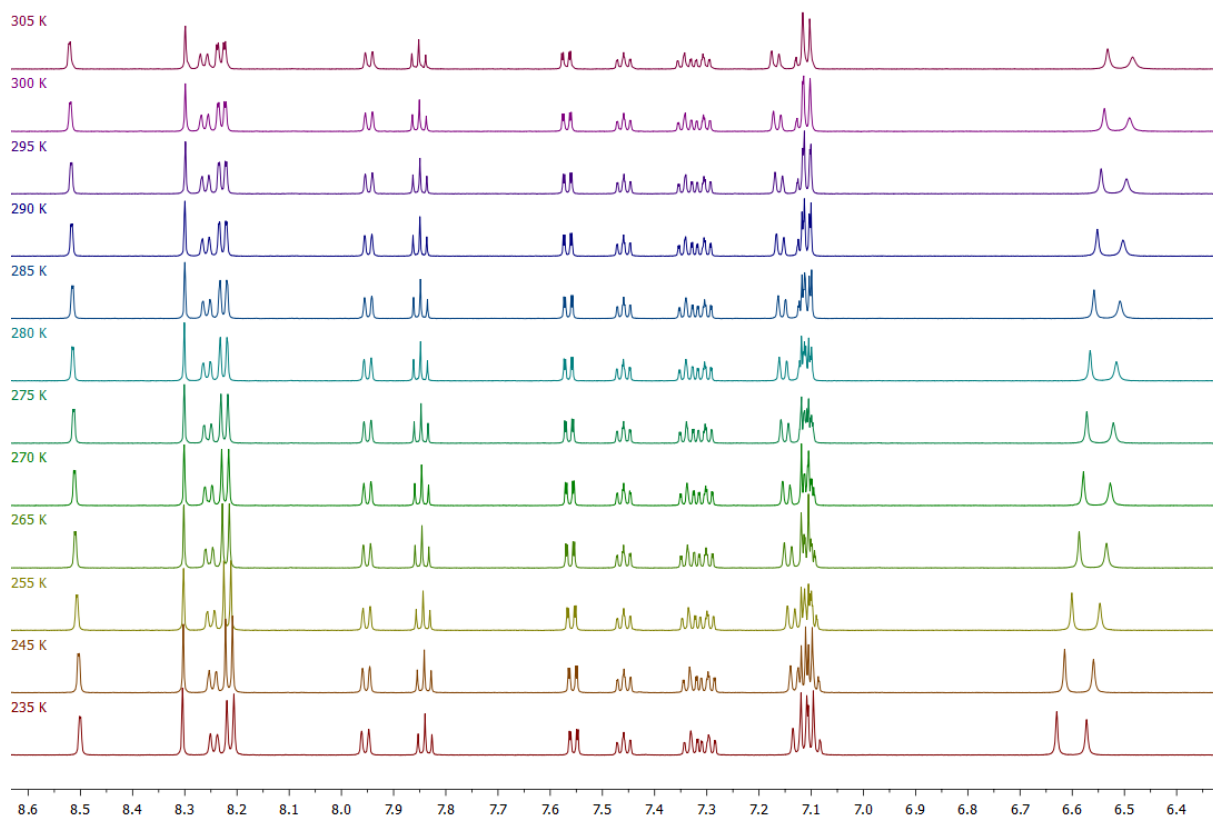

**Figure S24.** Variable-temperature  $^1\text{H}$  NMR (600 MHz,  $\text{CD}_2\text{Cl}_2$ ) of **(R)-1** from 235–305 K.

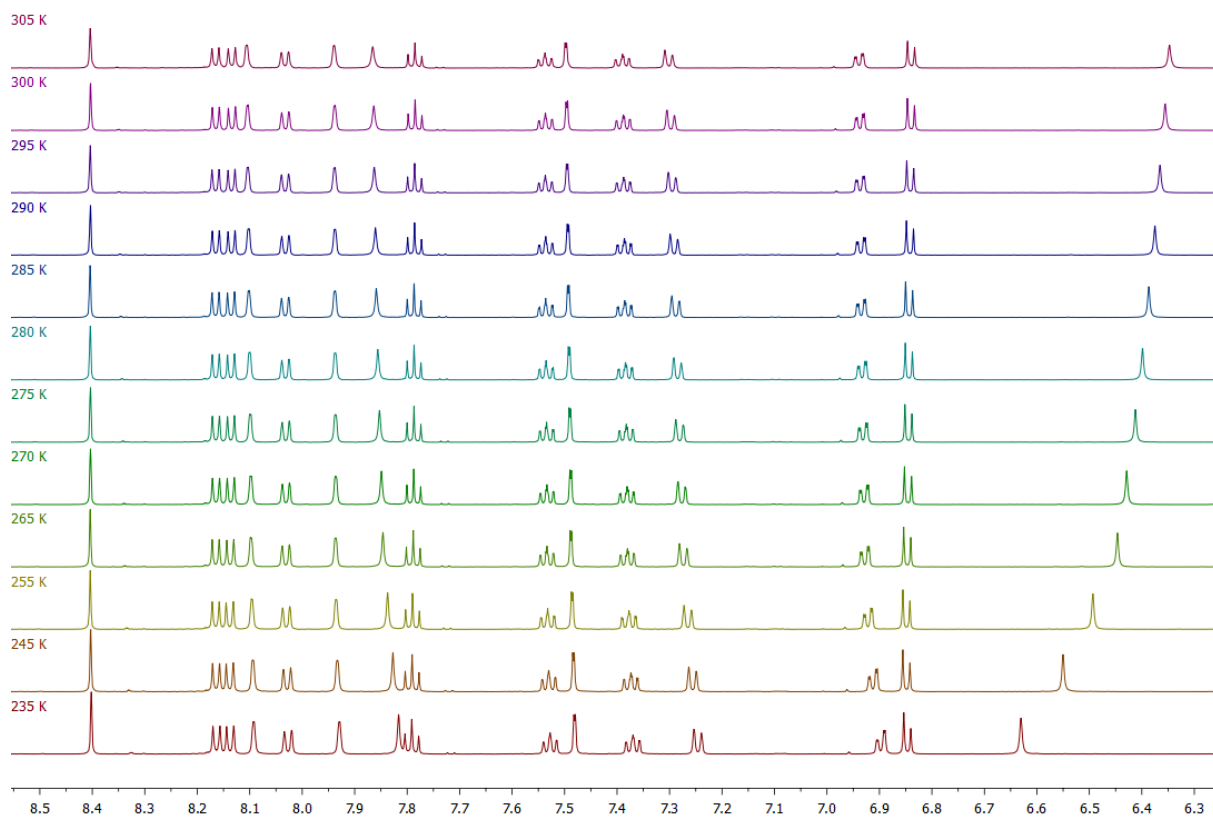

**Figure S25.** Variable-temperature  $^1\text{H}$  NMR (600 MHz,  $\text{CD}_2\text{Cl}_2$ ) of **(R)-2** from 235–305 K.

### 3. Optical Spectra: Photoluminescence lifetimes, $g_{lum}$ -vs-wavelength

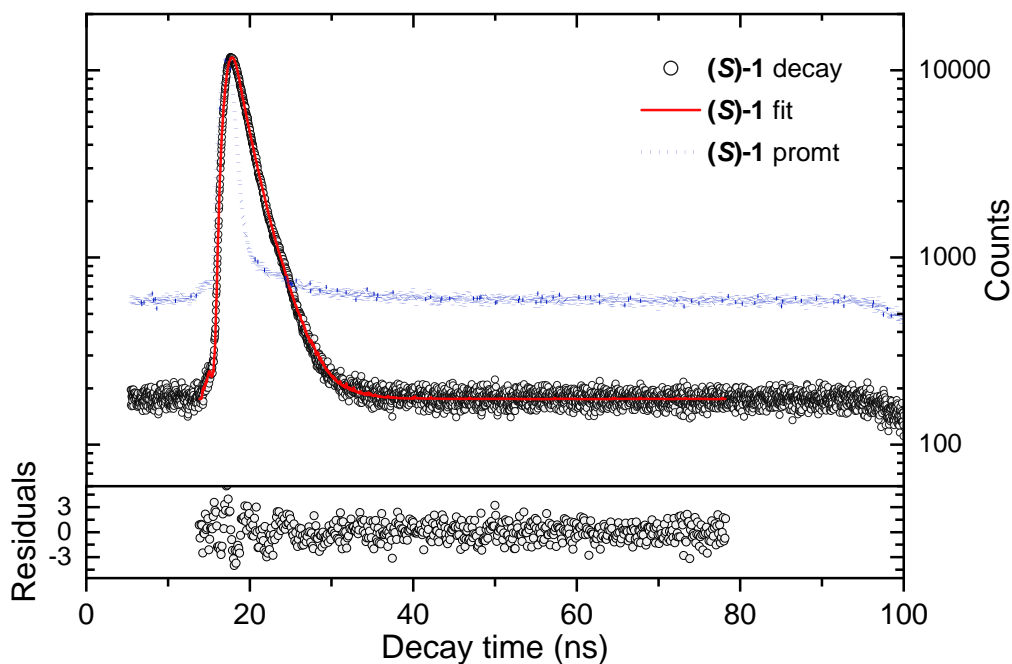

**Figure S26.** Time-resolved photoluminescence decay curves of (S)-1. The decay is best fitted to a biexponential equation ( $\chi^2 = 1.52$ ) with 0.07 ns,\* 1.82 ns (30 % and 70 % relative amplitudes, respectively), considering the instruments response function (IRF) by an iterative reconvolution fitting method. \*data artifact

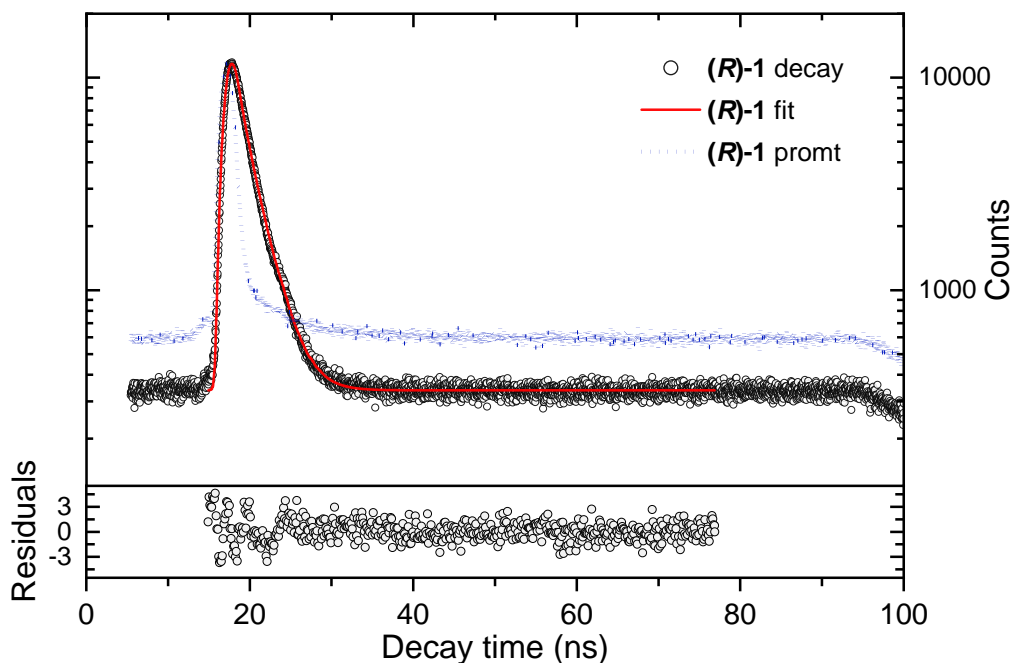

**Figure S27.** Time-resolved photoluminescence decay curves of (R)-1. The decay is best fitted to a biexponential equation ( $\chi^2 = 1.65$ ) with 0.14 ns,\* 1.91 ns (28 % and 72 % relative amplitudes, respectively), considering the instruments response function (IRF) by an iterative reconvolution fitting method. \*data artifact

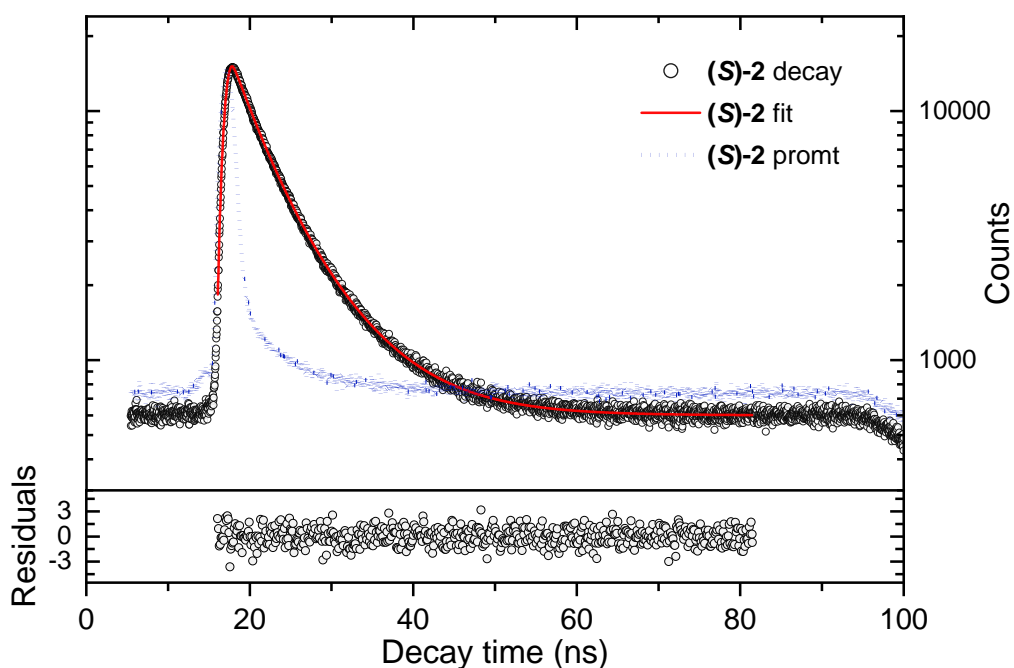

**Figure S28.** Time-resolved photoluminescence decay curves of (S)-2. The decay is best fitted to triexponential equation ( $\chi^2 = 1.12$ ) with  $\tau = 0.33$  ns,\* 3.43 ns, and 7.52 ns (-2 %, 40 % and 62 % relative amplitudes, respectively), considering the instruments response function (IRF) by an iterative reconvolution fitting method. \*data artifact

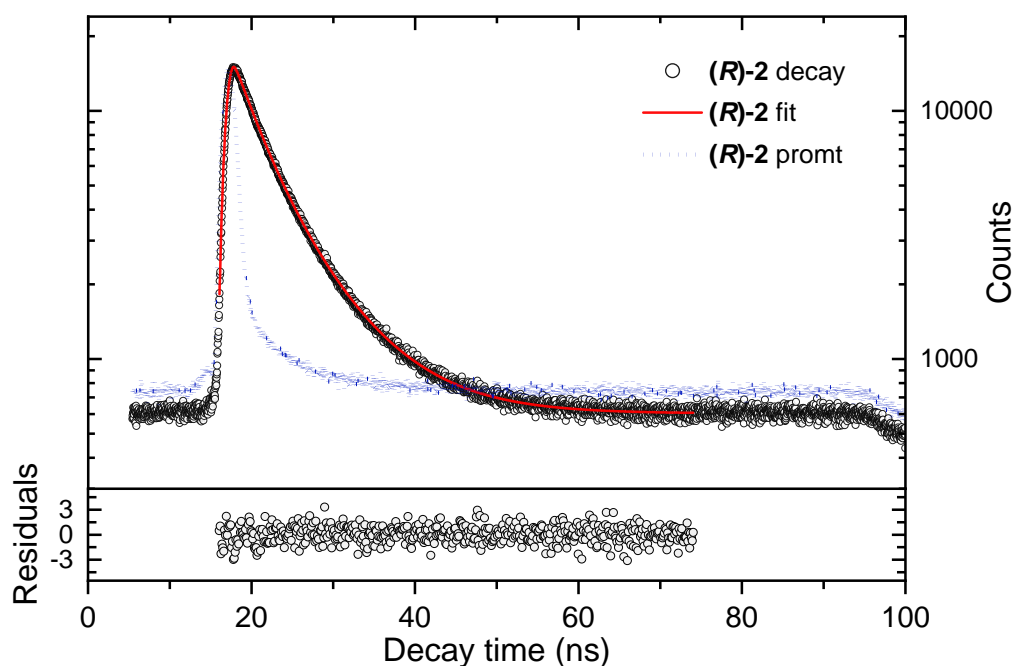

**Figure S29.** Time-resolved photoluminescence decay curves of (R)-2. The decay is best fitted to triexponential equation ( $\chi^2 = 1.02$ ) with  $\tau = 0.38$  ns,\* 3.25 ns, and 7.41 ns (-2 %, 38 %, and 64 % relative amplitudes, respectively), considering the instruments response function (IRF) by an iterative reconvolution fitting method. \*data artifact

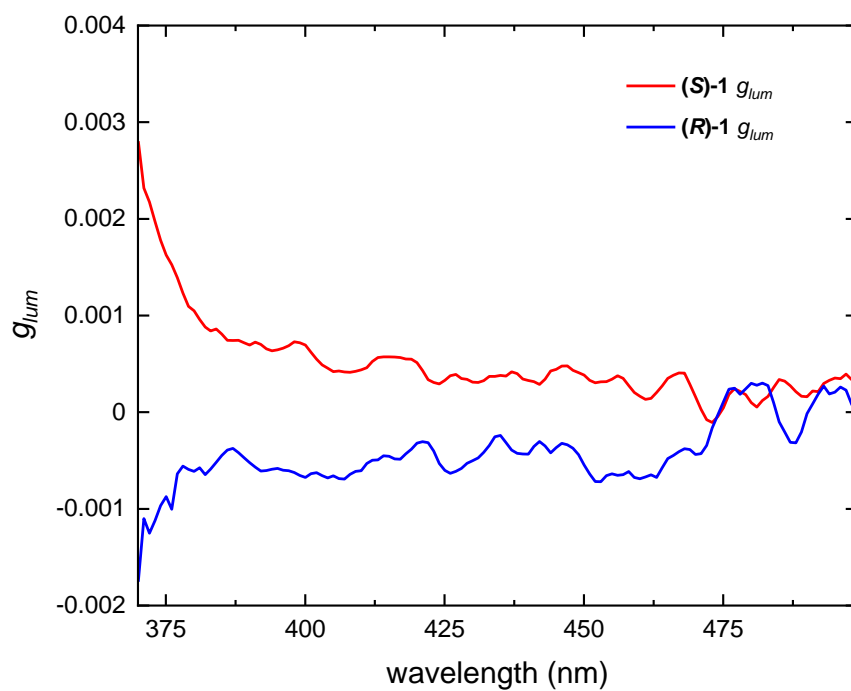

**Figure S30.**  $g_{lum}$ -vs-wavelength plot of **1**.

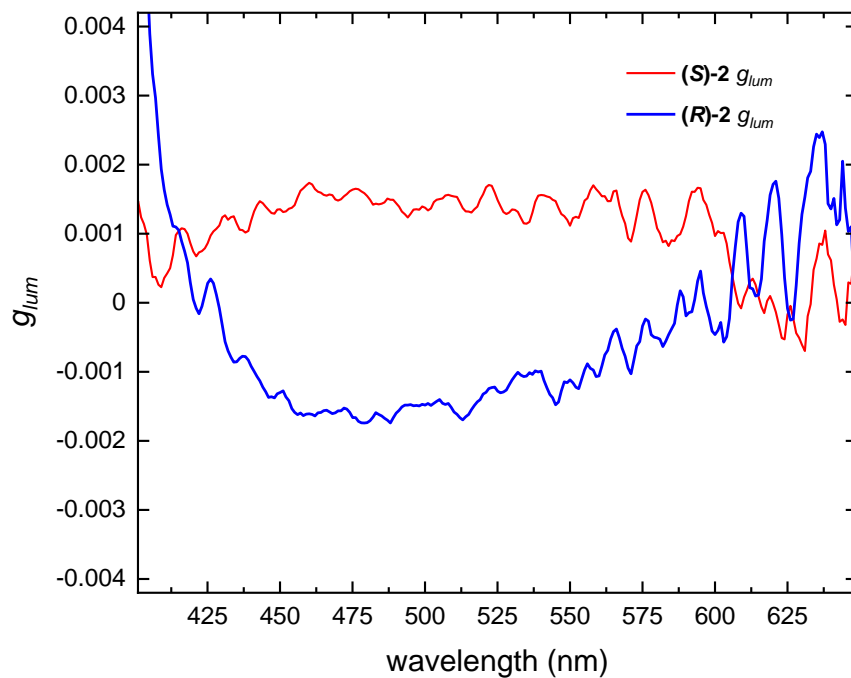

**Figure S31.**  $g_{lum}$ -vs-wavelength plot of **2**.

## 4. Computational studies

### Frontier Molecular Orbitals and Natural Transition Orbitals

The frontier molecular orbitals of **1** and **2'** (*n*-Bu groups replaced with H) were computed in subsequent single point computations using the M06-2X<sup>7</sup> hybrid density functional in conjunction with the def2-SV(P) basis set with the ORCA 5 program (Figure S32, Figure S33).<sup>8-10</sup> The prior geometry optimizations were performed at the same level of theory.

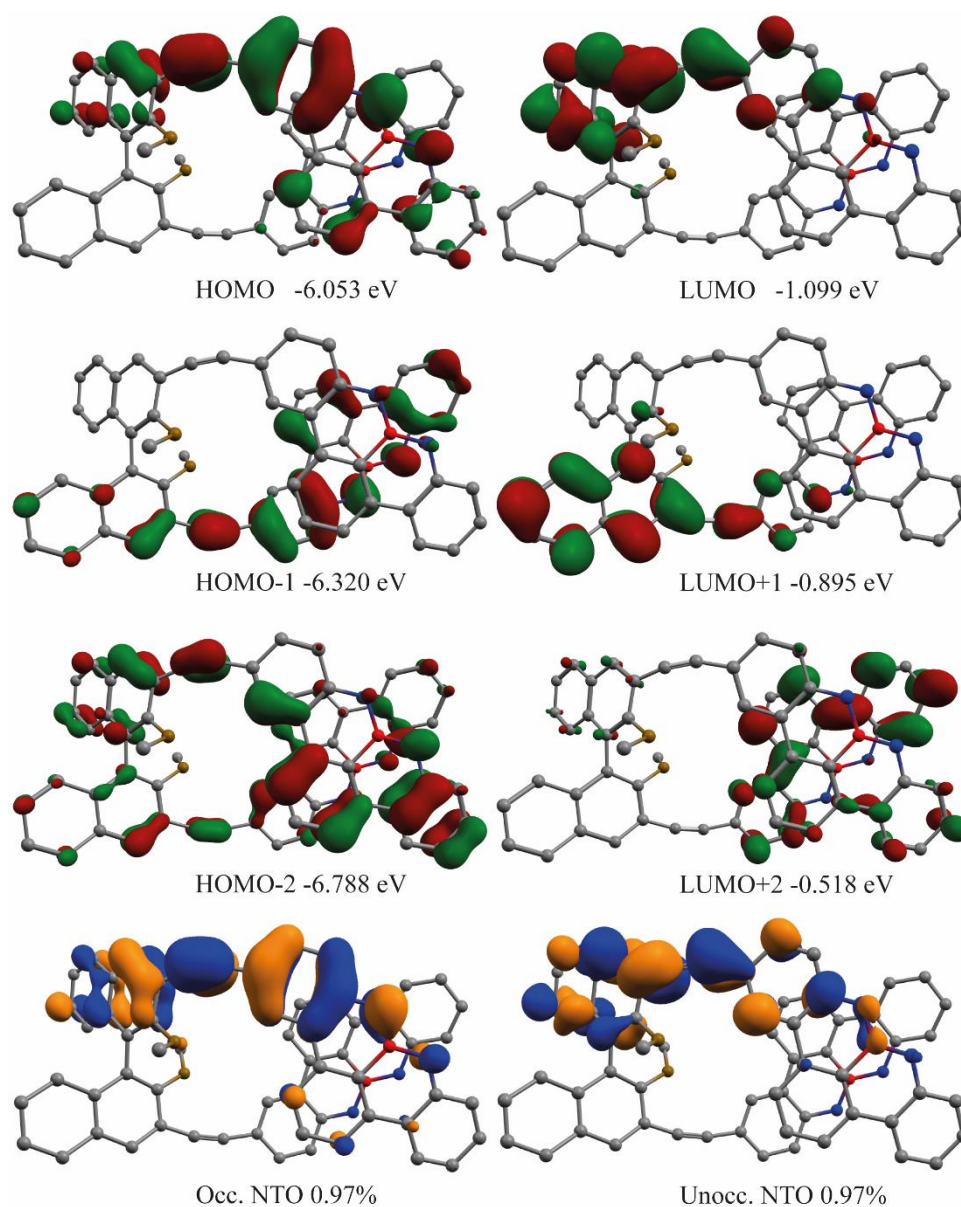

**Figure S32.** Frontier molecular orbitals and their energies and NTOs with relative contributions to the lowest energy transition of (**R**)-**1** as computed at the M06-2X/def2-SV(P) level of theory. For clarity, hydrogen atoms are omitted. Contour values plotted at 0.03.

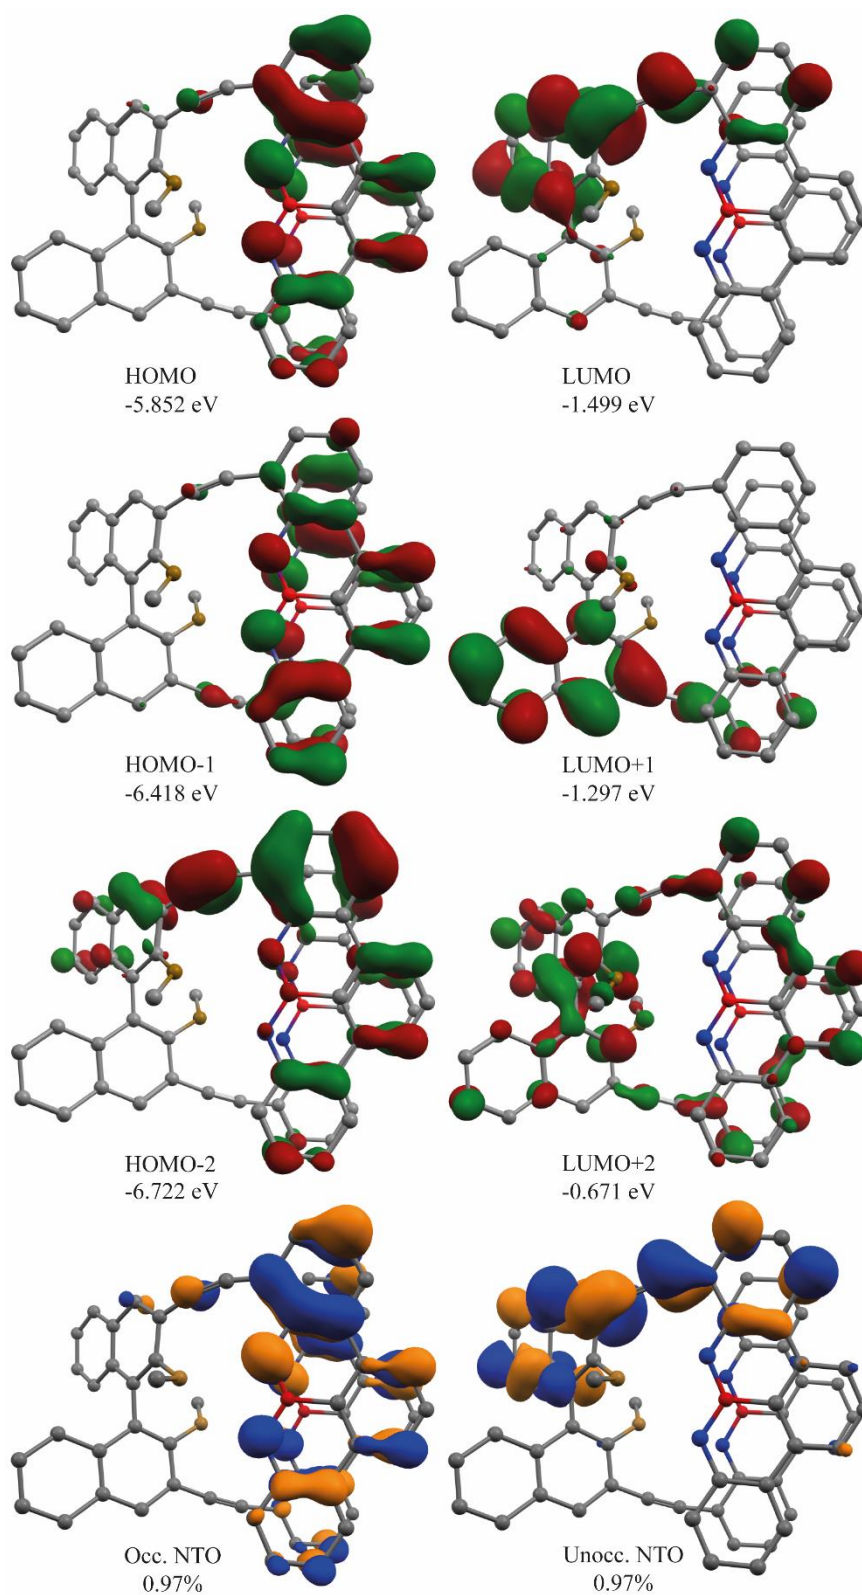

**Figure S33.** Frontier molecular orbitals and their energies and NTOs with relative contributions to the lowest energy transition of (*R*)-**2'** as computed at the M06-2X/def2-SV(P) level of theory. *n*-Bu groups are replaced with H. For clarity, hydrogen atoms are omitted. Contour values plotted at 0.03.

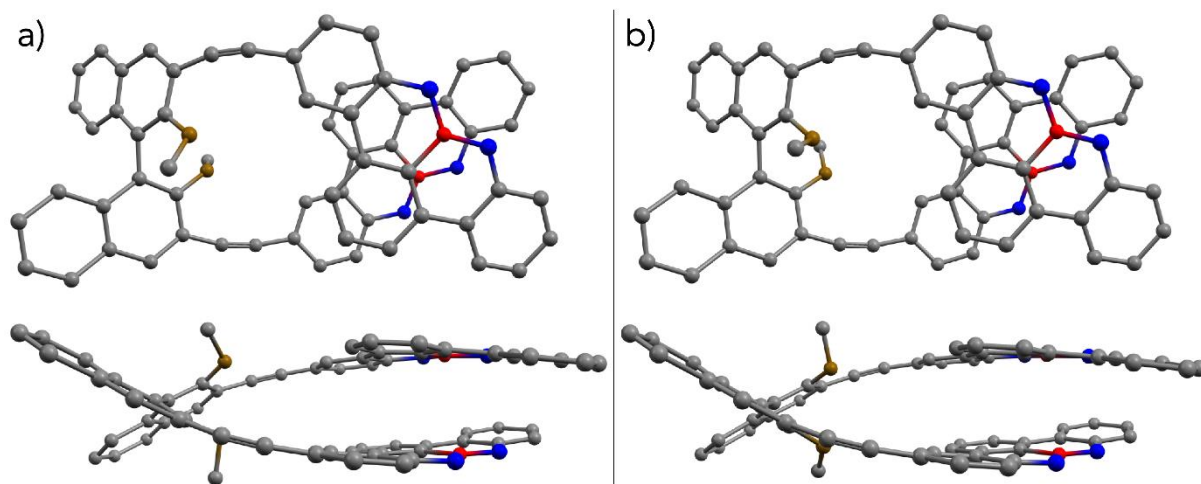

**Figure S34.** a) Ground state and b) first excited state structures of **1** under state-specific equilibrium solvation in  $\text{CH}_2\text{Cl}_2$  as computed at the M06-2X/def2-SV(P) level of theory. For clarity, hydrogen atoms are omitted.

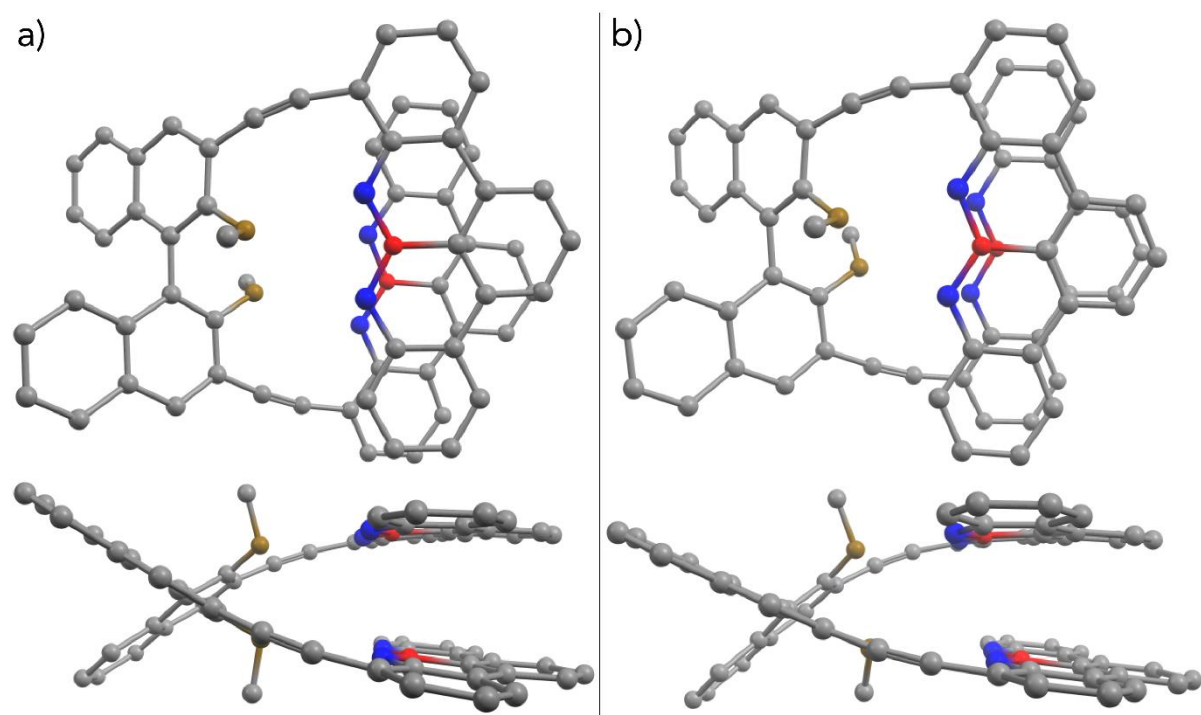

**Figure S35.** a) Ground state and b) first excited state structures of **2'** under state-specific equilibrium solvation in  $\text{CH}_2\text{Cl}_2$  as computed at the M06-2X/def2-SV(P) level of theory. For clarity, hydrogen atoms are omitted.

## Conformer Analysis with CREST and CENSO

The structures were preoptimized utilizing the semiempirical tight binding GFN-xTB method.<sup>11,12</sup> The obtained geometries were subjected to the conformer-rotamer ensemble sample tool (CREST)<sup>13,14</sup> at the GFN-xTB level of theory with CH<sub>2</sub>Cl<sub>2</sub> as solvent using the XTB<sup>11</sup> program. The conformer ensemble thus obtained was subsequently refined and sorted using the command line energetic sorting (CENSO) program<sup>15</sup> to compute the Boltzmann distribution of populated conformers. The computations were performed with the ORCA 5 software<sup>8-10</sup> and the continuum solvation model (SMD)<sup>16</sup> was applied to simulate solvation in CH<sub>2</sub>Cl<sub>2</sub>.

For the CREST computations standard parameters were applied. The obtained CREST conformers were fed into the CENSO program and part 0, part 1, and part 2 were performed with the following settings:

---

### CENSO PARAMETERS

---

---

### CRE SORTING SETTINGS

---

|                                                      |                                     |
|------------------------------------------------------|-------------------------------------|
| solvent:                                             | ch2cl2                              |
| temperature:                                         | 298.15                              |
| evaluate at different temperatures:                  | on                                  |
| temperature range:                                   | 273.15, 278.15, 283.15, 288.15, ... |
| calculate mRRHO contribution:                        | on                                  |
| consider symmetry for mRRHO contribution:            | on                                  |
| cautious checking for error and failed calculations: | on                                  |
| checking the DFT-ensemble using CREST:               | off                                 |
| maxthreads:                                          | 4                                   |
| omp:                                                 | 12                                  |
| automatically balance maxthreads and omp:            | on                                  |



---

## CRE CHEAP-PRESCREENING - PART0

---

part0: on  
program for part0: orca  
functional for fast single-point: b97-d3  
basis set for fast single-point: def2-SV(P)  
threshold g\_thr(0) for sorting in part0: 4.0  
Solvent model used with xTB: alpb  
short-notation:  
b97-d3/def2-SV(P) // GFNn-xTB (Input geometry)

---

## CRE PRESCREENING - PART1

---

part1: on  
program for part1: orca  
functional for initial evaluation: r2scan-3c  
basis set for initial evaluation: def2-mTZVPP  
calculate mRRHO contribution: on  
program for mRRHO contribution: xtb  
GFN version for mRRHO and/or GBSA\_Gsolv: gfn2  
Apply constraint to input geometry during mRRHO calculation: on  
solvent model applied with xTB: alpb  
evaluate at different temperatures: off  
threshold g\_thr(1) and G\_thr(1) for sorting in part1: 3.5  
solvent model for Gsolv contribution of part1: smd

short-notation:

r2scan-3c + SMD[ch2cl2] + GmRRHO(GFN2[alpb]-bhess) // GFNn-xTB (Input geometry)

-----  
**CRE OPTIMIZATION - PART2**  
-----

|                                                              |             |
|--------------------------------------------------------------|-------------|
| part2:                                                       | on          |
| program:                                                     | orca        |
| QM program employed only in the geometry opt.:               | orca        |
| functional for part2:                                        | r2scan-3c   |
| basis set for part2:                                         | def2-mTZVPP |
| using xTB-optimizer for optimization:                        | on          |
| using the new ensemble optimizer:                            | on          |
| optimize all conformers below this G_thr(opt,2) threshold:   | 2.5         |
| spearmanthr:                                                 | 0.907       |
| optimization level in part2:                                 | lax         |
| solvent model applied in the optimization:                   | smd         |
| solvent model for Gsolv contribution:                        | smd         |
| evaluate at different temperatures:                          | on          |
| Boltzmann sum threshold G_thr(2) for sorting in part2:       | 99.0        |
| calculate mRRHO contribution:                                | on          |
| program for mRRHO contribution:                              | xtb         |
| GFN version for mRRHO and/or GBSA_Gsolv:                     | gfn2        |
| Apply constraint to input geometry during mRRHO calculation: | on          |
| solvent model applied with xTB:                              | alpb        |

short-notation:

r2scan-3c + SMD[ch2cl2] + GmRRHO(GFN2[alpb]-bhess) // r2scan-3c[SMD]

According to CENSO, for **1** and **2'**, the sole populated conformer at room temperature is similar to the respective optimized lowest-energy structure at the M06-2X/def2-SV(P) level of theory, respectively (Figure S32/Figure S33).

### Dissymmetry Factor $g_{\text{lum,calcd.}}$

For detailed information on the procedure to calculate the  $g_{\text{lum}}$  value of compounds we refer to Kubo et al.<sup>17</sup> The geometries of the  $S_1$  states were optimized by analytic gradients<sup>18,19</sup> using TD-DFT along with the def2-SV(P)<sup>12</sup> basis set. The meta-hybrid GGA M06-2X<sup>7</sup> functional was used. The Polarizable Continuum Model (PCM) using the integral equation formalism variant (IEFPCM) was used to simulate an equilibrium solvent reaction field during optimization of the first excited state.<sup>20-23</sup> The TD-DFT calculation from this excited state to the ground state for the transition moments needed for  $g_{\text{lum,calcd.}}$  was performed under state-specific equilibrium solvation of the excited state at its equilibrium geometry. Using the corrected linear-response approach, the ground state energy at the excited state geometry was computed under non-equilibrium solvation with the static solvation from the excited state. The difference between the excited state and the ground state energy, both under excited state geometry and solvation correction, gives the vertical emission energy  $E_{\text{ex}}$ . These computations were run with the *Gaussian 16* package.<sup>24</sup>

The dissymmetry factor  $g_{\text{lum,calcd.}}$  was calculated as follows:  $g = 4R/(D+G)$ .  $R$  is the rotatory strength defined by the inner product of transition electric and magnetic dipole moments (it can be either calculated via  $R = |\mu_e| \cdot |\mu_m| \cdot \cos\theta$  or taken from the highlighted  $R(\text{length})$  column in Table S1 and Table S2, and  $D$  and  $G$  are the electric and magnetic dipole strengths defined by the square of transition electric and magnetic dipole moments, respectively ( $D = |\mu_e|^2$ ;  $G = |\mu_m|^2$ ).

**Table S1.** Cartesian coordinates (Å) and transition moments of the optimized structure of (**R**)-**1** in  $\text{CH}_2\text{Cl}_2$  in the lowest-energy excited state ( $S_1$ ) calculated at the M06-2X/def2-SV(P) level of theory.

| Center Number | Atomic Number | Atomic Type | Coordinates (Angstroms) |           |           |
|---------------|---------------|-------------|-------------------------|-----------|-----------|
|               |               |             | X                       | Y         | Z         |
| 1             | 6             | 0           | -5.618028               | -3.367379 | -0.955495 |
| 2             | 6             | 0           | -7.472030               | -1.322083 | -1.195418 |
| 3             | 6             | 0           | -7.899157               | -2.601443 | -0.870638 |
| 4             | 6             | 0           | -6.964452               | -3.635295 | -0.741296 |
| 5             | 1             | 0           | -4.902565               | -4.185187 | -0.850768 |
| 6             | 1             | 0           | -8.963550               | -2.794773 | -0.716900 |
| 7             | 6             | 0           | -6.107536               | -1.038518 | -1.390687 |
| 8             | 6             | 0           | -5.149178               | -2.082873 | -1.286597 |
| 9             | 6             | 0           | -3.708764               | -1.801975 | -1.465234 |
| 10            | 7             | 0           | -5.716514               | 0.264394  | -1.647904 |
| 11            | 1             | 0           | -6.471340               | 0.945707  | -1.651606 |
| 12            | 5             | 0           | -4.346555               | 0.647347  | -1.720080 |

|    |   |   |           |           |           |
|----|---|---|-----------|-----------|-----------|
| 13 | 6 | 0 | -3.292236 | -0.462312 | -1.627600 |
| 14 | 6 | 0 | -1.924584 | -0.117622 | -1.702404 |
| 15 | 7 | 0 | -3.893568 | 1.991638  | -1.882621 |
| 16 | 1 | 0 | -4.534515 | 2.779182  | -1.918440 |
| 17 | 6 | 0 | -1.557471 | 1.313445  | -1.753488 |
| 18 | 6 | 0 | -2.552896 | 2.323800  | -1.840478 |
| 19 | 6 | 0 | -2.166074 | 3.679194  | -1.859377 |
| 20 | 6 | 0 | -0.838612 | 4.056369  | -1.744987 |
| 21 | 6 | 0 | 0.155908  | 3.070107  | -1.619194 |
| 22 | 6 | 0 | -0.226093 | 1.722012  | -1.643279 |
| 23 | 1 | 0 | -2.945293 | 4.442312  | -1.939787 |
| 24 | 1 | 0 | -0.567319 | 5.113987  | -1.735992 |
| 25 | 1 | 0 | 0.567272  | 0.981817  | -1.525129 |
| 26 | 6 | 0 | -2.727209 | -2.806845 | -1.437465 |
| 27 | 6 | 0 | -0.970274 | -1.145519 | -1.678634 |
| 28 | 6 | 0 | -1.380530 | -2.471896 | -1.558621 |
| 29 | 1 | 0 | 0.097874  | -0.933060 | -1.747284 |
| 30 | 1 | 0 | -0.627373 | -3.264386 | -1.538203 |
| 31 | 1 | 0 | -2.995167 | -3.859044 | -1.328670 |
| 32 | 1 | 0 | -7.286780 | -4.645653 | -0.481741 |
| 33 | 6 | 0 | 5.339784  | 0.780853  | -0.139469 |
| 34 | 6 | 0 | 6.306881  | 1.616222  | 0.512268  |
| 35 | 6 | 0 | 4.262312  | 1.371190  | -0.778985 |
| 36 | 6 | 0 | 6.137415  | 3.033879  | 0.503700  |
| 37 | 6 | 0 | 4.023486  | 2.789054  | -0.677384 |
| 38 | 6 | 0 | 4.966165  | 3.591922  | -0.072935 |
| 39 | 1 | 0 | 4.796598  | 4.668936  | -0.002954 |
| 40 | 6 | 0 | 5.343675  | -0.703195 | 0.003063  |
| 41 | 6 | 0 | 4.272634  | -1.263167 | 0.652083  |
| 42 | 6 | 0 | 6.343926  | -1.563749 | -0.595939 |
| 43 | 6 | 0 | 6.206935  | -2.994148 | -0.450566 |
| 44 | 6 | 0 | 4.068607  | -2.697824 | 0.721284  |
| 45 | 6 | 0 | 5.092481  | -3.539222 | 0.195967  |
| 46 | 1 | 0 | 4.977181  | -4.623608 | 0.254469  |
| 47 | 6 | 0 | -5.699071 | 3.303916  | 0.976309  |
| 48 | 6 | 0 | -7.488694 | 1.195395  | 1.197837  |
| 49 | 6 | 0 | -7.956887 | 2.464725  | 0.899409  |
| 50 | 6 | 0 | -7.054416 | 3.530025  | 0.778860  |
| 51 | 1 | 0 | -5.011262 | 4.145583  | 0.877515  |
| 52 | 1 | 0 | -9.027821 | 2.628598  | 0.758157  |
| 53 | 6 | 0 | -6.112677 | 0.954525  | 1.375710  |
| 54 | 6 | 0 | -5.186897 | 2.029485  | 1.283638  |
| 55 | 6 | 0 | -3.739935 | 1.792601  | 1.454054  |
| 56 | 7 | 0 | -5.678909 | -0.338925 | 1.608831  |
| 57 | 1 | 0 | -6.410954 | -1.045682 | 1.602553  |
| 58 | 5 | 0 | -4.301630 | -0.667137 | 1.678737  |
| 59 | 6 | 0 | -3.281475 | 0.466617  | 1.604907  |
| 60 | 6 | 0 | -1.904470 | 0.164473  | 1.684015  |
| 61 | 7 | 0 | -3.800799 | -2.011835 | 1.830835  |
| 62 | 1 | 0 | -4.424914 | -2.815838 | 1.863647  |
| 63 | 6 | 0 | -1.488361 | -1.253140 | 1.738164  |
| 64 | 6 | 0 | -2.474022 | -2.299763 | 1.815283  |
| 65 | 6 | 0 | -2.052963 | -3.665998 | 1.861911  |
| 66 | 6 | 0 | -0.733638 | -4.013377 | 1.789106  |

|     |   |   |           |           |           |
|-----|---|---|-----------|-----------|-----------|
| 67  | 6 | 0 | 0.269623  | -2.993340 | 1.658092  |
| 68  | 6 | 0 | -0.160046 | -1.626121 | 1.653203  |
| 69  | 1 | 0 | -0.433776 | -5.062635 | 1.813307  |
| 70  | 1 | 0 | 0.621780  | -0.875538 | 1.526472  |
| 71  | 6 | 0 | -2.788403 | 2.828517  | 1.440900  |
| 72  | 6 | 0 | -0.982946 | 1.219774  | 1.670347  |
| 73  | 6 | 0 | -1.433406 | 2.535670  | 1.560416  |
| 74  | 1 | 0 | 0.090910  | 1.038559  | 1.738155  |
| 75  | 1 | 0 | -0.704956 | 3.350390  | 1.547741  |
| 76  | 1 | 0 | -3.089409 | 3.872231  | 1.339798  |
| 77  | 1 | 0 | -8.182349 | 0.355231  | 1.289659  |
| 78  | 1 | 0 | -7.411562 | 4.533202  | 0.537817  |
| 79  | 6 | 0 | 1.550147  | 3.315892  | -1.390700 |
| 80  | 6 | 0 | 2.732664  | 3.227999  | -1.115879 |
| 81  | 6 | 0 | 1.624095  | -3.220516 | 1.492424  |
| 82  | 6 | 0 | 2.826899  | -3.100886 | 1.175889  |
| 83  | 8 | 0 | 3.302543  | -0.472015 | 1.191061  |
| 84  | 8 | 0 | 3.321625  | 0.683023  | -1.458174 |
| 85  | 6 | 0 | 7.427344  | -1.050609 | -1.330452 |
| 86  | 6 | 0 | 8.387258  | -1.887861 | -1.888285 |
| 87  | 1 | 0 | 9.220821  | -1.464126 | -2.452615 |
| 88  | 6 | 0 | 8.280621  | -3.286741 | -1.721496 |
| 89  | 1 | 0 | 9.039396  | -3.943973 | -2.154316 |
| 90  | 6 | 0 | 7.222509  | -3.827252 | -1.026788 |
| 91  | 1 | 0 | 7.130831  | -4.910736 | -0.910178 |
| 92  | 1 | 0 | 7.511588  | 0.032375  | -1.457070 |
| 93  | 6 | 0 | 7.107683  | 3.857972  | 1.138512  |
| 94  | 6 | 0 | 8.192221  | 3.306922  | 1.778226  |
| 95  | 1 | 0 | 8.931056  | 3.948845  | 2.263319  |
| 96  | 6 | 0 | 8.342392  | 1.898586  | 1.821662  |
| 97  | 1 | 0 | 9.194562  | 1.461500  | 2.347697  |
| 98  | 6 | 0 | 7.423680  | 1.076012  | 1.209947  |
| 99  | 1 | 0 | 7.546782  | -0.008430 | 1.252713  |
| 100 | 1 | 0 | 6.966366  | 4.942084  | 1.115566  |
| 101 | 1 | 0 | -2.823394 | -4.437432 | 1.943253  |
| 102 | 1 | 0 | -8.193817 | -0.506662 | -1.295011 |
| 103 | 6 | 0 | 3.526205  | -0.127158 | 2.545932  |
| 104 | 1 | 0 | 4.457750  | 0.459666  | 2.647035  |
| 105 | 1 | 0 | 2.672060  | 0.484176  | 2.870104  |
| 106 | 1 | 0 | 3.590536  | -1.032765 | 3.175842  |
| 107 | 6 | 0 | 3.686328  | -0.355712 | -2.349742 |
| 108 | 1 | 0 | 3.042476  | -0.252498 | -3.236842 |
| 109 | 1 | 0 | 4.744048  | -0.263572 | -2.648327 |
| 110 | 1 | 0 | 3.525656  | -1.346486 | -1.894984 |

-----  
Ground to excited state transition electric dipole moments (Au):

| state | X      | Y       | Z       | Dip. S. | Osc.   |
|-------|--------|---------|---------|---------|--------|
| 1     | 4.3798 | -0.9970 | -1.0429 | 21.2644 | 1.6052 |
| 2     | 3.9893 | 1.0529  | 0.6679  | 17.4693 | 1.5763 |
| 3     | 0.8475 | 0.3955  | -0.1127 | 0.8874  | 0.0820 |

Ground to excited state transition velocity dipole moments (Au):

| state | X | Y | Z | Dip. S. | Osc. |
|-------|---|---|---|---------|------|
|-------|---|---|---|---------|------|

|   |         |         |         |        |        |
|---|---------|---------|---------|--------|--------|
| 1 | -0.5054 | 0.1209  | 0.1214  | 0.2847 | 1.6764 |
| 2 | -0.5488 | -0.1517 | -0.0926 | 0.3328 | 1.6391 |
| 3 | -0.1303 | -0.0591 | 0.0159  | 0.0207 | 0.0997 |

Ground to excited state transition magnetic dipole moments (Au):

|       |         |         |         |
|-------|---------|---------|---------|
| state | X       | Y       | Z       |
| 1     | -0.9220 | -2.4504 | -3.6228 |
| 2     | -1.1092 | 2.0774  | 4.0951  |
| 3     | 1.0226  | -0.2219 | 0.1561  |

Ground to excited state transition velocity quadrupole moments (Au):

|       |         |         |        |         |         |         |
|-------|---------|---------|--------|---------|---------|---------|
| state | XX      | YY      | ZZ     | XY      | XZ      | YZ      |
| 1     | -3.1592 | -0.3051 | 0.1491 | 1.9471  | 0.3656  | -0.4163 |
| 2     | -3.1725 | -0.3284 | 0.1310 | -1.1596 | -0.3399 | -0.4276 |
| 3     | 1.4533  | 0.4871  | 0.0042 | 0.5760  | 0.0869  | -0.9475 |

$\langle 0 | \text{del} | b \rangle * \langle b | r x \text{del} | 0 \rangle + \langle 0 | \text{del} | b \rangle * \langle b | \text{del} r + r \text{del} | 0 \rangle$

Rotatory Strengths (R) in cgs ( $10^{*-40}$  erg-esu-cm/Gauss)

|       |            |          |           |             |           |
|-------|------------|----------|-----------|-------------|-----------|
| state | XX         | YY       | ZZ        | R(velocity) | E-M Angle |
| 1     | -1697.7670 | 1.2251   | 11.2239   | -561.7726   | 96.50     |
| 2     | -1668.1895 | 932.1546 | 288.5620  | -149.1576   | 91.80     |
| 3     | 76.3257    | -42.0326 | -634.8133 | -200.1734   | 140.57    |

$1/2[\langle 0 | r | b \rangle * \langle b | r x \text{del} | 0 \rangle + (\langle 0 | r x \text{del} | b \rangle * \langle b | r | 0 \rangle)]$

Rotatory Strengths (R) in cgs ( $10^{*-40}$  erg-esu-cm/Gauss)

|       |           |            |            |           |
|-------|-----------|------------|------------|-----------|
| state | XX        | YY         | ZZ         | R(length) |
| 1     | 2855.6994 | -1727.6554 | -2671.7481 | -514.5680 |
| 2     | 3129.2920 | -1546.8341 | -1934.2236 | -117.2552 |
| 3     | -612.8631 | 62.0761    | 12.4329    | -179.4514 |

-----  
Summary of chiroptical properties of (R)-1 (M06-2X/def2-SV(P))

| state | $ \mu_e $<br>/ $10^{-20}$ esu-cm | $ \mu_m $<br>/ $10^{-20}$ erg/Gauss | $\cos\theta$<br>(E-M Angle) | $g_{lum, calcd.}$<br>( $4R/(D+G)$ ) | $E_{ex}$<br>/nm |
|-------|----------------------------------|-------------------------------------|-----------------------------|-------------------------------------|-----------------|
| 1     | 1173                             | 4.145                               | -0.11320                    | 0.00150                             | 395             |

**Table S2.** Cartesian coordinates (Å) and transition moments of the optimized structure of (R)-2 in CH<sub>2</sub>Cl<sub>2</sub> in the lowest-energy excited state (S<sub>1</sub>) calculated at the M06-2X/def2-SV(P) level of theory.

| Center Number | Atomic Number | Atomic Type | Coordinates (Angstroms) |           |          |
|---------------|---------------|-------------|-------------------------|-----------|----------|
|               |               |             | X                       | Y         | Z        |
| 1             | 6             | 0           | -3.427928               | -3.784527 | 1.983128 |
| 2             | 6             | 0           | -0.601606               | -3.936100 | 1.764994 |
| 3             | 6             | 0           | -1.371110               | -5.108495 | 1.933196 |
| 4             | 6             | 0           | -2.754629               | -5.016380 | 2.037049 |
| 5             | 1             | 0           | -4.514713               | -3.778090 | 2.063264 |
| 6             | 1             | 0           | -0.870600               | -6.077476 | 1.945164 |
| 7             | 6             | 0           | -1.297505               | -2.643555 | 1.781084 |
| 8             | 6             | 0           | -2.726514               | -2.571735 | 1.850930 |
| 9             | 6             | 0           | -3.393816               | -1.267780 | 1.767060 |
| 10            | 7             | 0           | -0.548822               | -1.529909 | 1.690941 |

|    |   |   |           |           |           |
|----|---|---|-----------|-----------|-----------|
| 11 | 1 | 0 | 0.464757  | -1.659541 | 1.598885  |
| 12 | 5 | 0 | -1.107183 | -0.197722 | 1.719271  |
| 13 | 6 | 0 | -2.618186 | -0.081610 | 1.763197  |
| 14 | 6 | 0 | -3.200579 | 1.201573  | 1.707912  |
| 15 | 7 | 0 | -0.319149 | 0.977516  | 1.691586  |
| 16 | 1 | 0 | 0.695441  | 0.951936  | 1.589973  |
| 17 | 6 | 0 | -2.316833 | 2.382130  | 1.768274  |
| 18 | 6 | 0 | -0.901512 | 2.233668  | 1.783767  |
| 19 | 6 | 0 | -0.077968 | 3.368002  | 1.904977  |
| 20 | 6 | 0 | -0.622070 | 4.637870  | 1.977673  |
| 21 | 6 | 0 | -2.013116 | 4.803498  | 1.932194  |
| 22 | 6 | 0 | -2.833703 | 3.690558  | 1.833793  |
| 23 | 1 | 0 | 1.006660  | 3.226722  | 1.927795  |
| 24 | 1 | 0 | 0.036352  | 5.505610  | 2.063820  |
| 25 | 1 | 0 | -3.914500 | 3.838449  | 1.816783  |
| 26 | 6 | 0 | -4.792411 | -1.137973 | 1.675303  |
| 27 | 6 | 0 | -4.600926 | 1.290019  | 1.607913  |
| 28 | 6 | 0 | -5.370317 | 0.126923  | 1.585220  |
| 29 | 1 | 0 | -5.105136 | 2.254419  | 1.530242  |
| 30 | 1 | 0 | -6.455825 | 0.209800  | 1.488036  |
| 31 | 1 | 0 | -5.438666 | -2.016760 | 1.641427  |
| 32 | 1 | 0 | -3.341681 | -5.931327 | 2.150801  |
| 33 | 1 | 0 | -2.452756 | 5.802066  | 1.979628  |
| 34 | 6 | 0 | 4.011758  | -0.809246 | -0.183142 |
| 35 | 6 | 0 | 4.941904  | -1.505370 | -1.042078 |
| 36 | 6 | 0 | 3.108163  | -1.524819 | 0.556063  |
| 37 | 6 | 0 | 4.923436  | -2.942055 | -1.049723 |
| 38 | 6 | 0 | 3.001209  | -2.965498 | 0.475433  |
| 39 | 6 | 0 | 3.963693  | -3.645613 | -0.299677 |
| 40 | 1 | 0 | 3.926319  | -4.734997 | -0.364733 |
| 41 | 6 | 0 | 3.941407  | 0.677385  | -0.140524 |
| 42 | 6 | 0 | 2.806007  | 1.305914  | -0.613692 |
| 43 | 6 | 0 | 4.996741  | 1.466285  | 0.425210  |
| 44 | 6 | 0 | 4.869565  | 2.886673  | 0.467344  |
| 45 | 6 | 0 | 2.663728  | 2.733051  | -0.550033 |
| 46 | 6 | 0 | 3.687487  | 3.495428  | -0.023926 |
| 47 | 1 | 0 | 3.583026  | 4.581707  | 0.024346  |
| 48 | 6 | 0 | -4.262810 | -3.462764 | -1.535470 |
| 49 | 6 | 0 | -1.503075 | -3.509743 | -1.263620 |
| 50 | 6 | 0 | -2.208057 | -4.701540 | -1.294616 |
| 51 | 6 | 0 | -3.600768 | -4.680836 | -1.421458 |
| 52 | 1 | 0 | -5.348630 | -3.472461 | -1.642522 |
| 53 | 1 | 0 | -1.672183 | -5.649339 | -1.205307 |
| 54 | 6 | 0 | -2.168430 | -2.271374 | -1.364401 |
| 55 | 6 | 0 | -3.583338 | -2.234316 | -1.521510 |
| 56 | 6 | 0 | -4.293384 | -0.944406 | -1.658805 |
| 57 | 7 | 0 | -1.429926 | -1.105149 | -1.313803 |
| 58 | 1 | 0 | -0.432382 | -1.226839 | -1.157327 |
| 59 | 5 | 0 | -2.032390 | 0.184169  | -1.435198 |
| 60 | 6 | 0 | -3.547412 | 0.254585  | -1.625766 |
| 61 | 6 | 0 | -4.162469 | 1.521225  | -1.737863 |
| 62 | 7 | 0 | -1.299463 | 1.402306  | -1.398238 |
| 63 | 1 | 0 | -0.290654 | 1.418933  | -1.232501 |
| 64 | 6 | 0 | -3.321105 | 2.737157  | -1.672919 |

|     |   |   |           |           |           |
|-----|---|---|-----------|-----------|-----------|
| 65  | 6 | 0 | -1.913725 | 2.630058  | -1.509134 |
| 66  | 6 | 0 | -1.119654 | 3.811880  | -1.451392 |
| 67  | 6 | 0 | -1.716464 | 5.070134  | -1.542013 |
| 68  | 6 | 0 | -3.097111 | 5.177448  | -1.695073 |
| 69  | 6 | 0 | -3.873975 | 4.025886  | -1.758881 |
| 70  | 1 | 0 | -1.087121 | 5.960548  | -1.484709 |
| 71  | 1 | 0 | -4.952304 | 4.137093  | -1.880897 |
| 72  | 6 | 0 | -5.685006 | -0.856058 | -1.816983 |
| 73  | 6 | 0 | -5.556920 | 1.571002  | -1.895936 |
| 74  | 6 | 0 | -6.295852 | 0.390995  | -1.935379 |
| 75  | 1 | 0 | -6.084931 | 2.520642  | -1.991067 |
| 76  | 1 | 0 | -7.380373 | 0.444363  | -2.060359 |
| 77  | 1 | 0 | -6.310424 | -1.749105 | -1.850699 |
| 78  | 1 | 0 | -0.414503 | -3.511896 | -1.150677 |
| 79  | 1 | 0 | -4.169649 | -5.612867 | -1.436092 |
| 80  | 1 | 0 | -3.568922 | 6.159275  | -1.765013 |
| 81  | 6 | 0 | 0.763926  | -3.881599 | 1.498454  |
| 82  | 6 | 0 | 1.883959  | -3.547967 | 1.076109  |
| 83  | 6 | 0 | 0.283040  | 3.634718  | -1.243887 |
| 84  | 6 | 0 | 1.419048  | 3.287326  | -0.982431 |
| 85  | 8 | 0 | 1.747857  | 0.620128  | -1.135168 |
| 86  | 8 | 0 | 2.236896  | -0.868876 | 1.394493  |
| 87  | 6 | 0 | 6.167556  | 0.873115  | 0.975411  |
| 88  | 6 | 0 | 7.163990  | 1.652072  | 1.516851  |
| 89  | 1 | 0 | 8.055180  | 1.178458  | 1.935146  |
| 90  | 6 | 0 | 7.045218  | 3.064700  | 1.538453  |
| 91  | 1 | 0 | 7.846426  | 3.670499  | 1.967585  |
| 92  | 6 | 0 | 5.920684  | 3.665851  | 1.027704  |
| 93  | 1 | 0 | 5.811283  | 4.753379  | 1.048092  |
| 94  | 1 | 0 | 6.266795  | -0.214699 | 0.963862  |
| 95  | 6 | 0 | 5.869379  | -3.623924 | -1.877221 |
| 96  | 6 | 0 | 6.758027  | -2.928900 | -2.664272 |
| 97  | 1 | 0 | 7.469455  | -3.471891 | -3.291730 |
| 98  | 6 | 0 | 6.751321  | -1.514335 | -2.673951 |
| 99  | 1 | 0 | 7.450879  | -0.967618 | -3.309814 |
| 100 | 6 | 0 | 5.856069  | -0.824015 | -1.874501 |
| 101 | 1 | 0 | 5.853746  | 0.269171  | -1.881886 |
| 102 | 1 | 0 | 5.864249  | -4.717407 | -1.879176 |
| 103 | 6 | 0 | 1.967345  | -0.158451 | -2.308056 |
| 104 | 1 | 0 | 2.139625  | -1.217209 | -2.052498 |
| 105 | 1 | 0 | 1.062849  | -0.066422 | -2.929896 |
| 106 | 1 | 0 | 2.835241  | 0.224011  | -2.870370 |
| 107 | 6 | 0 | 2.721554  | -0.756693 | 2.729639  |
| 108 | 1 | 0 | 3.635266  | -0.137219 | 2.749234  |
| 109 | 1 | 0 | 1.931317  | -0.270978 | 3.321282  |
| 110 | 1 | 0 | 2.936911  | -1.755273 | 3.147544  |

-----  
Ground to excited state transition electric dipole moments (Au):

| state | X       | Y      | Z      | Dip. S. | Osc.   |
|-------|---------|--------|--------|---------|--------|
| 1     | -2.7340 | 0.8436 | 0.8726 | 8.9476  | 0.6393 |
| 2     | 2.4746  | 0.6515 | 0.4818 | 6.7805  | 0.5659 |



|                                                                  |         |         |         |         |        |
|------------------------------------------------------------------|---------|---------|---------|---------|--------|
| 3                                                                | 1.2809  | -0.1691 | -1.0903 | 2.8580  | 0.2523 |
| Ground to excited state transition velocity dipole moments (Au): |         |         |         |         |        |
| state                                                            | X       | Y       | Z       | Dip. S. | Osc.   |
| 1                                                                | 0.3046  | -0.0987 | -0.0955 | 0.1116  | 0.6942 |
| 2                                                                | -0.3261 | -0.0873 | -0.0626 | 0.1179  | 0.6276 |
| 3                                                                | -0.1720 | 0.0259  | 0.1472  | 0.0519  | 0.2615 |

|                                                                  |         |         |         |  |  |
|------------------------------------------------------------------|---------|---------|---------|--|--|
| Ground to excited state transition magnetic dipole moments (Au): |         |         |         |  |  |
| state                                                            | X       | Y       | Z       |  |  |
| 1                                                                | 1.1555  | 1.5637  | 3.0616  |  |  |
| 2                                                                | -0.9889 | 1.0796  | 2.2918  |  |  |
| 3                                                                | 0.1560  | -0.6472 | -2.4510 |  |  |

|                                                                      |         |         |         |         |         |         |
|----------------------------------------------------------------------|---------|---------|---------|---------|---------|---------|
| Ground to excited state transition velocity quadrupole moments (Au): |         |         |         |         |         |         |
| state                                                                | XX      | YY      | ZZ      | XY      | XZ      | YZ      |
| 1                                                                    | 0.9115  | 0.3453  | -0.0342 | -1.1128 | -0.1890 | 0.0965  |
| 2                                                                    | -0.0175 | -0.5939 | 0.1521  | -0.7184 | 0.5597  | 0.0643  |
| 3                                                                    | -1.6076 | 0.7210  | -0.0065 | 1.8396  | 1.1549  | -1.0890 |

$$\langle 0 | \text{del} | b \rangle * \langle b | r x \text{del} | 0 \rangle + \langle 0 | \text{del} | b \rangle * \langle b | \text{del} r + r \text{del} | 0 \rangle$$

Rotatory Strengths (R) in cgs ( $10^{*-40}$  erg-esu-cm/Gauss)

|       |            |            |           |             |           |
|-------|------------|------------|-----------|-------------|-----------|
| state | XX         | YY         | ZZ        | R(velocity) | E-M Angle |
| 1     | -1184.4252 | -57.3017   | 616.5571  | -208.3900   | 94.49     |
| 2     | -406.4936  | 318.9302   | 565.7389  | 159.3918    | 84.80     |
| 3     | -365.1711  | -1257.9083 | -536.7840 | -719.9545   | 134.32    |

$$1/2[\langle 0 | r | b \rangle * \langle b | r x \text{del} | 0 \rangle + (\langle 0 | r x \text{del} | b \rangle * \langle b | r | 0 \rangle) *]$$

Rotatory Strengths (R) in cgs ( $10^{*-40}$  erg-esu-cm/Gauss)

|       |           |           |            |           |
|-------|-----------|-----------|------------|-----------|
| state | XX        | YY        | ZZ         | R(length) |
| 1     | 2233.9461 | -932.7952 | -1889.1673 | -196.0055 |
| 2     | 1730.4895 | -497.4240 | -780.7647  | 150.7669  |
| 3     | -141.2613 | -77.3766  | -1889.8058 | -702.8146 |

-----  
Summary of chiroptical properties of (R)-2 (M06-2X/def2-SV(P))

| state | $ \mu_e $<br>/ $10^{-20}$ esu-cm | $ \mu_m $<br>/ $10^{-20}$ erg/Gauss | $\cos\theta$<br>(E-M Angle) | $g_{lum,calcd.}$<br>( $4R/(D+G)$ ) | $E_{ex}$<br>/nm |
|-------|----------------------------------|-------------------------------------|-----------------------------|------------------------------------|-----------------|
| 1     | 761                              | 3.364                               | -0.07829                    | 0.00135                            | 432             |

-----

## 5. Cartesian Coordinates

All Cartesian coordinates given below were computed at the r<sup>2</sup>SCAN-3c/def2-mTZVPP level of theory level alongside the continuum solvation model SMD<sup>16</sup> and are given in Å and absolute energies are given in atomic units.

110

**(R)**-1 from CENSO, -2804.78378765

|   |              |              |              |
|---|--------------|--------------|--------------|
| 6 | 6.538833990  | 0.255254158  | -2.705917106 |
| 6 | 7.971682988  | -1.587324017 | -1.212005082 |
| 6 | 8.642120167  | -0.703356444 | -2.037179467 |
| 6 | 7.921581439  | 0.229311724  | -2.788697793 |
| 1 | 6.002064761  | 0.982810653  | -3.305709223 |
| 1 | 9.726710253  | -0.736143466 | -2.095110247 |
| 6 | 6.570608073  | -1.562826850 | -1.115624606 |
| 6 | 5.820069291  | -0.630066392 | -1.882632794 |
| 6 | 4.352116257  | -0.607159441 | -1.805575576 |
| 7 | 5.938328319  | -2.458966335 | -0.270923695 |
| 1 | 6.560624563  | -3.062581672 | 0.252685073  |
| 5 | 4.524469495  | -2.496887684 | -0.125862961 |
| 6 | 3.695109582  | -1.529251739 | -0.955303531 |
| 6 | 2.284200888  | -1.557291589 | -0.846732554 |
| 7 | 3.836569028  | -3.392773146 | 0.748062830  |
| 1 | 4.320128520  | -4.056536463 | 1.341433935  |
| 6 | 1.662725045  | -2.516054383 | 0.082279982  |
| 6 | 2.462171708  | -3.399435954 | 0.862093216  |
| 6 | 1.848732165  | -4.283623934 | 1.768981452  |
| 6 | 0.481228467  | -4.301586119 | 1.941338414  |
| 6 | -0.330080879 | -3.425881275 | 1.192515688  |
| 6 | 0.279980395  | -2.559585328 | 0.274180589  |
| 1 | 2.478641271  | -4.953656858 | 2.350071946  |
| 1 | 0.028224393  | -4.980731171 | 2.657119509  |
| 1 | -0.366927603 | -1.890457737 | -0.281403917 |
| 6 | 3.568214236  | 0.293456440  | -2.543230584 |
| 6 | 1.536251677  | -0.656196849 | -1.616554962 |
| 6 | 2.182903584  | 0.251976446  | -2.446580870 |
| 1 | 0.452674330  | -0.636536714 | -1.574473809 |
| 1 | 1.588284763  | 0.951362028  | -3.029120723 |
| 1 | 4.019245334  | 1.028938241  | -3.200260704 |
| 1 | 8.438084964  | 0.928558288  | -3.439982448 |
| 6 | -5.617412387 | -0.735951878 | 0.447184956  |
| 6 | -6.542358167 | -0.895737988 | 1.524472354  |
| 6 | -4.518239305 | -1.575458248 | 0.370644287  |
| 6 | -6.309940817 | -1.911748491 | 2.509392210  |
| 6 | -4.206826948 | -2.488515827 | 1.435804150  |
| 6 | -5.118913961 | -2.665792822 | 2.459755093  |
| 1 | -4.899789721 | -3.370360115 | 3.257369445  |
| 6 | -5.682611454 | 0.432220029  | -0.469129743 |
| 6 | -4.657545316 | 1.352878055  | -0.377911307 |
| 6 | -6.692533400 | 0.608307986  | -1.462558118 |
| 6 | -6.630767378 | 1.747941158  | -2.329166284 |

|   |              |              |              |
|---|--------------|--------------|--------------|
| 6 | -4.533620897 | 2.436590909  | -1.310580188 |
| 6 | -5.534871242 | 2.633584924  | -2.245744956 |
| 1 | -5.454079042 | 3.449125618  | -2.959349861 |
| 6 | 6.226596736  | -0.222684788 | 2.477107169  |
| 6 | 7.618530113  | 1.545330702  | 0.859276052  |
| 6 | 8.310966103  | 0.636949265  | 1.638239940  |
| 6 | 7.611091495  | -0.258760679 | 2.451501061  |
| 1 | 5.706767114  | -0.927353811 | 3.117718241  |
| 1 | 9.397047905  | 0.620158687  | 1.609616164  |
| 6 | 6.214972465  | 1.584248598  | 0.874673911  |
| 6 | 5.485228865  | 0.688692213  | 1.703553582  |
| 6 | 4.015706284  | 0.730062783  | 1.739350371  |
| 7 | 5.560190006  | 2.506528175  | 0.076509552  |
| 1 | 6.167940167  | 3.095227011  | -0.480109754 |
| 5 | 4.142398802  | 2.609834728  | 0.043670477  |
| 6 | 3.336260721  | 1.665818577  | 0.921986767  |
| 6 | 1.923604611  | 1.740613488  | 0.905185403  |
| 7 | 3.431747957  | 3.562714029  | -0.748901775 |
| 1 | 3.899278074  | 4.225353363  | -1.356124173 |
| 6 | 1.277757358  | 2.700993141  | -0.005423208 |
| 6 | 2.055036817  | 3.592696811  | -0.799358589 |
| 6 | 1.414791862  | 4.503082875  | -1.661219200 |
| 6 | 0.043638773  | 4.519246435  | -1.799146573 |
| 6 | -0.742599600 | 3.611977168  | -1.062194923 |
| 6 | -0.107877090 | 2.734442324  | -0.171034529 |
| 1 | -0.429834778 | 5.212347910  | -2.487711472 |
| 1 | -0.738384620 | 2.041984167  | 0.375293094  |
| 6 | 3.252497080  | -0.126829149 | 2.546422812  |
| 6 | 1.196189311  | 0.878200618  | 1.736989857  |
| 6 | 1.865933284  | -0.037236547 | 2.540513830  |
| 1 | 0.112116223  | 0.898250509  | 1.767637615  |
| 1 | 1.288852053  | -0.709293193 | 3.171344253  |
| 1 | 3.720335421  | -0.866992414 | 3.186603123  |
| 1 | 8.152352894  | 2.243162535  | 0.217810577  |
| 1 | 8.145759395  | -0.978335307 | 3.064773681  |
| 6 | -1.731010729 | -3.328244760 | 1.359311317  |
| 6 | -2.916894306 | -3.064779953 | 1.424445799  |
| 6 | -2.138645961 | 3.468710605  | -1.227380099 |
| 6 | -3.306753651 | 3.136257402  | -1.299270843 |
| 8 | -3.663930563 | 1.169151116  | 0.544439794  |
| 8 | -3.601848990 | -1.553568028 | -0.628133446 |
| 6 | -7.743203636 | -0.321893852 | -1.641399718 |
| 6 | -8.707903823 | -0.120807433 | -2.602417385 |
| 1 | -9.508757750 | -0.845125117 | -2.723069542 |
| 6 | -8.664121027 | 1.016754772  | -3.436335460 |
| 1 | -9.433261522 | 1.163335144  | -4.189532735 |
| 6 | -7.644083744 | 1.928012161  | -3.304686220 |
| 1 | -7.590348837 | 2.797465804  | -3.955464105 |
| 1 | -7.783527666 | -1.201607970 | -1.005335088 |
| 6 | -7.241441916 | -2.083364783 | 3.563797128  |
| 6 | -8.346047438 | -1.272295025 | 3.668478621  |
| 1 | -9.052628327 | -1.411797518 | 4.481783379  |

|   |              |              |              |
|---|--------------|--------------|--------------|
| 6 | -8.551445509 | -0.241517630 | 2.727551910  |
| 1 | -9.412690848 | 0.413511008  | 2.827387386  |
| 6 | -7.670134320 | -0.054005073 | 1.686602494  |
| 1 | -7.840851340 | 0.748003969  | 0.975280220  |
| 1 | -7.055374631 | -2.864254808 | 4.297422572  |
| 1 | 2.027570224  | 5.187962531  | -2.243044910 |
| 1 | 8.522224132  | -2.312100268 | -0.616010398 |
| 6 | -3.745458135 | 2.059164481  | 1.673999827  |
| 1 | -2.901514143 | 1.813607541  | 2.322278539  |
| 1 | -3.676146034 | 3.108536480  | 1.363072100  |
| 1 | -4.684358168 | 1.897723204  | 2.219184315  |
| 6 | -4.044407574 | -1.434073874 | -1.993494641 |
| 1 | -3.996473116 | -0.397559702 | -2.341437342 |
| 1 | -3.354664227 | -2.045041385 | -2.582880349 |
| 1 | -5.063287256 | -1.818694680 | -2.108502374 |

110

**(R)-2'** from CENSO, -2804.80129876

|   |              |              |              |
|---|--------------|--------------|--------------|
| 6 | -3.253550044 | -5.158399115 | -0.152774691 |
| 6 | -0.551296783 | -4.513020708 | -0.274575590 |
| 6 | -0.992467963 | -5.770764757 | -0.695871434 |
| 6 | -2.341253424 | -6.092798949 | -0.624368212 |
| 1 | -4.301112400 | -5.436547422 | -0.122126286 |
| 1 | -0.267565469 | -6.480455110 | -1.082573697 |
| 6 | -1.482401801 | -3.559425898 | 0.236799727  |
| 6 | -2.865225230 | -3.879809071 | 0.278778892  |
| 6 | -3.846647195 | -2.881362550 | 0.736129826  |
| 7 | -1.019035889 | -2.336360798 | 0.660445314  |
| 1 | -0.014045304 | -2.202326198 | 0.578640508  |
| 5 | -1.895682441 | -1.318214913 | 1.143662630  |
| 6 | -3.385972630 | -1.614551239 | 1.171212859  |
| 6 | -4.285262769 | -0.610573817 | 1.607960979  |
| 7 | -1.460165467 | -0.043402413 | 1.600540153  |
| 1 | -0.488962149 | 0.244759934  | 1.592336378  |
| 6 | -3.746277919 | 0.682954527  | 2.053786009  |
| 6 | -2.345592829 | 0.925806721  | 2.040694937  |
| 6 | -1.842667299 | 2.165452153  | 2.468192272  |
| 6 | -2.693810554 | 3.168472345  | 2.893521212  |
| 6 | -4.074852353 | 2.952192048  | 2.901642853  |
| 6 | -4.579253166 | 1.729895072  | 2.488926425  |
| 1 | -0.767082839 | 2.328333023  | 2.443973830  |
| 1 | -2.284282662 | 4.122910536  | 3.213228101  |
| 1 | -5.653905478 | 1.583869070  | 2.505911051  |
| 6 | -5.226959369 | -3.126189247 | 0.738004843  |
| 6 | -5.658678452 | -0.894997602 | 1.595043984  |
| 6 | -6.106926871 | -2.137184363 | 1.162858139  |
| 1 | -6.390845809 | -0.162782610 | 1.917204429  |
| 1 | -7.174561683 | -2.341657671 | 1.156537131  |
| 1 | -5.634808490 | -4.075470226 | 0.409592672  |
| 1 | -2.685643900 | -7.070742163 | -0.945842400 |
| 1 | -4.752269630 | 3.735425481  | 3.228731581  |
| 6 | 4.204750914  | -0.730993506 | 0.076454547  |

|   |              |              |              |
|---|--------------|--------------|--------------|
| 6 | 5.287501848  | -1.078861448 | -0.791432209 |
| 6 | 3.133520205  | -1.595498964 | 0.199649701  |
| 6 | 5.246240499  | -2.313915713 | -1.514211184 |
| 6 | 3.064503955  | -2.806780976 | -0.566990301 |
| 6 | 4.118434657  | -3.149997095 | -1.394282720 |
| 1 | 4.070450168  | -4.070387242 | -1.969375269 |
| 6 | 4.167454223  | 0.585411033  | 0.761994975  |
| 6 | 3.207663897  | 1.511144443  | 0.401437260  |
| 6 | 5.047339102  | 0.878208727  | 1.851100128  |
| 6 | 4.922078627  | 2.123935279  | 2.545517497  |
| 6 | 3.040075751  | 2.732488447  | 1.135556560  |
| 6 | 3.902724098  | 3.024241342  | 2.176696310  |
| 1 | 3.781825687  | 3.951542745  | 2.729524381  |
| 6 | -3.914317276 | -1.635247057 | -3.306550515 |
| 6 | -1.207479859 | -2.061703520 | -2.894777251 |
| 6 | -1.977456977 | -3.052274721 | -3.475623733 |
| 6 | -3.344375164 | -2.841597493 | -3.679009779 |
| 1 | -4.975515043 | -1.492438858 | -3.479766674 |
| 1 | -1.516504823 | -3.992784488 | -3.765422396 |
| 6 | -1.778447436 | -0.839036453 | -2.506233903 |
| 6 | -3.162972442 | -0.599083825 | -2.722198496 |
| 6 | -3.768848826 | 0.685630738  | -2.339844684 |
| 7 | -0.975198281 | 0.119995846  | -1.911827178 |
| 1 | -0.016132126 | -0.166676358 | -1.756047418 |
| 5 | -1.478024447 | 1.390959370  | -1.518719726 |
| 6 | -2.944532775 | 1.692211265  | -1.779132933 |
| 6 | -3.465835886 | 2.957019014  | -1.411960352 |
| 7 | -0.691255604 | 2.397758112  | -0.882204610 |
| 1 | 0.284495016  | 2.254701377  | -0.632816075 |
| 6 | -2.561223726 | 3.958052092  | -0.821164434 |
| 6 | -1.209063336 | 3.624910013  | -0.543364141 |
| 6 | -0.372712201 | 4.566728273  | 0.128474755  |
| 6 | -0.863974088 | 5.832772081  | 0.459472017  |
| 6 | -2.172716232 | 6.172801752  | 0.143482331  |
| 6 | -3.000776801 | 5.245599515  | -0.475439457 |
| 1 | -0.211245234 | 6.534300313  | 0.969846909  |
| 1 | -4.022214970 | 5.537515628  | -0.693060665 |
| 6 | -5.134075491 | 0.961097286  | -2.507504549 |
| 6 | -4.835622887 | 3.192662163  | -1.594885411 |
| 6 | -5.644737786 | 2.198121418  | -2.132947092 |
| 1 | -5.291124881 | 4.135579709  | -1.313247062 |
| 1 | -6.706436364 | 2.392792286  | -2.261601669 |
| 1 | -5.813082338 | 0.224401272  | -2.922472550 |
| 1 | -0.144878272 | -2.219566783 | -2.721405737 |
| 1 | -3.959639418 | -3.616067545 | -4.127409758 |
| 1 | -2.554514360 | 7.158406571  | 0.390978515  |
| 6 | 0.794454587  | -4.107946267 | -0.386541312 |
| 6 | 1.881056910  | -3.568993826 | -0.477588640 |
| 6 | 0.918151923  | 4.133090672  | 0.494656990  |
| 6 | 1.942794047  | 3.551923325  | 0.798026321  |
| 8 | 2.299800921  | 1.317285912  | -0.600042717 |
| 8 | 2.036122388  | -1.350962358 | 0.971596718  |

|   |             |              |              |
|---|-------------|--------------|--------------|
| 6 | 6.014836763 | -0.049145812 | 2.307189981  |
| 6 | 6.839712842 | 0.253480177  | 3.366702473  |
| 1 | 7.575535510 | -0.473321692 | 3.699546189  |
| 6 | 6.737014191 | 1.495275945  | 4.028376184  |
| 1 | 7.397228633 | 1.720051040  | 4.861214922  |
| 6 | 5.792760093 | 2.408673549  | 3.627514117  |
| 1 | 5.688261248 | 3.361239326  | 4.141211118  |
| 1 | 6.101765408 | -1.011574611 | 1.812570010  |
| 6 | 6.319535326 | -2.653084662 | -2.376158831 |
| 6 | 7.384639547 | -1.801375126 | -2.540612686 |
| 1 | 8.201224390 | -2.068301320 | -3.205442288 |
| 6 | 7.411268349 | -0.568661460 | -1.855069948 |
| 1 | 8.247238146 | 0.109633192  | -2.002167551 |
| 6 | 6.388262472 | -0.214467450 | -1.004940771 |
| 1 | 6.421077176 | 0.740510998  | -0.489930425 |
| 1 | 6.275402611 | -3.597708650 | -2.912686151 |
| 6 | 2.784058186 | 0.979443077  | -1.919740188 |
| 1 | 2.794031405 | -0.103171489 | -2.076286229 |
| 1 | 2.089561901 | 1.445634025  | -2.624101513 |
| 1 | 3.787729427 | 1.387261349  | -2.076690951 |
| 6 | 2.219801416 | -1.000839611 | 2.361567907  |
| 1 | 1.378218209 | -1.448202036 | 2.898237605  |
| 1 | 3.156781259 | -1.419175242 | 2.742781771  |
| 1 | 2.210561466 | 0.083879636  | 2.503980480  |

## References

- 1 F. Zinna, T. Bruhn, C. A. Guido, J. Ahrens, M. Bröring, L. Di Bari, G. Pescitelli, L. Di Bari and G. Pescitelli, *Chem. A Eur. J.*, 2016, **22**, 16089–16098.
- 2 X. Wang, F. Zhang, K. Sebastian Schellhammer, P. Machata, F. Ortmann, G. Cuniberti, Y. Fu, J. Hunger, R. Tang, A. A. Popov, R. Berger, K. Müllen and X. Feng, *J. Am. Chem. Soc.*, 2016, **138**, 11606–11615.
- 3 M. Fingerle, S. Stocker and H. F. Bettinger, *Synth.*, 2019, **51**, 4147–4152.
- 4 M. R. Rapp, W. Leis, F. Zinna, L. Di Bari, T. Arnold, B. Speiser, M. Seitz and H. F. Bettinger, *Chem. A Eur. J.*, 2022, **28**, e202104161.
- 5 Y. Meng, W. T. Slaven IV, D. Wang, T. J. Liu, H. F. Chow and C. J. Li, *Tetrahedron Asymmetry*, 1998, **9**, 3693–3707.
- 6 J. Hua and W. Lin, *Org. Lett.*, 2004, **6**, 861–864.
- 7 Y. Zhao and D. G. Truhlar, *Theor. Chem. Acc.*, 2008, **120**, 215–241.
- 8 F. Neese, *WIREs Comput. Mol. Sci.*, 2012, **2**, 73–78.
- 9 F. Neese, F. Wennmohs, U. Becker and C. Riplinger, *J. Chem. Phys.*, 2020, **152**, 224108.
- 10 F. Neese, *WIREs Comput. Mol. Sci.*, 2022, **12**, e1606.
- 11 S. Grimme, C. Bannwarth and P. Shushkov, *J. Chem. Theory Comput.*, 2017, **13**, 1989–2009.

- 12 F. Weigend and R. Ahlrichs, *Phys. Chem. Chem. Phys.*, 2005, **7**, 3297–3305.
- 13 P. Pracht, F. Bohle and S. Grimme, *Phys. Chem. Chem. Phys.*, 2020, **22**, 7169–7192.
- 14 S. Grimme, *J. Chem. Theory Comput.*, 2019, **15**, 2847–2862.
- 15 S. Grimme, F. Bohle, A. Hansen, P. Pracht, S. Spicher and M. Stahn, *J. Phys. Chem. A*, 2021, **125**, 4039–4054.
- 16 A. V. Marenich, C. J. Cramer and D. G. Truhlar, *J. Phys. Chem. B*, 2009, **113**, 6378–6396.
- 17 H. Kubo, T. Hirose, T. Nakashima, T. Kawai, J. Y. Hasegawa and K. Matsuda, *J. Phys. Chem. Lett.*, 2021, **12**, 686–695.
- 18 F. Furche and R. Ahlrichs, *J. Chem. Phys.*, 2002, **117**, 7433–7447.
- 19 G. Scalmani, M. J. Frisch, B. Mennucci, J. Tomasi, R. Cammi and V. Barone, *J. Chem. Phys.*, 2006, **124**, 094107.
- 20 S. Miertuš, E. Scrocco and J. Tomasi, *Chem. Phys.*, 1981, **55**, 117–129.
- 21 S. Miertuš and J. Tomasi, *Chem. Phys.*, 1982, **65**, 239–245.
- 22 J. L. Pascual-ahuir, E. Silla and I. Tuñon, *J. Comput. Chem.*, 1994, **15**, 1127–1138.
- 23 J. Tomasi, B. Mennucci and R. Cammi, *Chem. Rev.*, 2005, **105**, 2999–3093.
- 24 M. J. Frisch, G. W. Trucks, H. B. Schlegel, G. E. Scuseria, M. A. Robb, J. R. Cheeseman, G. Scalmani, V. Barone, G. a. Petersson, H. Nakatsuji, X. Li, M. Caricato, a. V. Marenich, J. Bloino, B. G. Janesko, R. Gomperts, B. Mennucci, H. P. Hratchian, J. V. Ortiz, a. F. Izmaylov, J. L. Sonnenberg, Williams, F. Ding, F. Lipparini, F. Egidi, J. Goings, B. Peng, A. Petrone, T. Henderson, D. Ranasinghe, V. G. Zakrzewski, J. Gao, N. Rega, G. Zheng, W. Liang, M. Hada, M. Ehara, K. Toyota, R. Fukuda, J. Hasegawa, M. Ishida, T. Nakajima, Y. Honda, O. Kitao, H. Nakai, T. Vreven, K. Throssell, J. a. Montgomery Jr., J. E. Peralta, F. Ogliaro, M. J. Bearpark, J. J. Heyd, E. N. Brothers, K. N. Kudin, V. N. Staroverov, T. a. Keith, R. Kobayashi, J. Normand, K. Raghavachari, a. P. Rendell, J. C. Burant, S. S. Iyengar, J. Tomasi, M. Cossi, J. M. Millam, M. Klene, C. Adamo, R. Cammi, J. W. Ochterski, R. L. Martin, K. Morokuma, O. Farkas, J. B. Foresman and D. J. Fox, 2016.
